# Supplementary material for: A bioinformatics pipeline for Screening Nodule-specific Cysteine-Rich (NCR) like peptides from Trigonella foenum-graecum and Medicago truncatula genomes
Source: Research Square preprint supplement (doi:10.21203/rs.3.rs-7218712/v1), 2025-07-31
Supplement: Supplementary file 1 [file e09cd6067ac3ff5033623a0e.xlsx]

## Sheet: T. foenum-graecum
Peptide sequences	Charge	Isoelectric point	Molecular weight	GRAVY hydrophobicity index	Boman index	Antimicrobial potential probability
CMKSGAWQPSCQFNGDCRKWCDPSKQFGHCVNGKCWCSIIPPSSNHIPTLKP	3.86238	8.80989	5809.72	-0.567308	1.44981	0.958319
NNNFPPCLRSGDCPEDMCPSHLAPKCINLNCFCV	-1.20809	5.3792	3753.35	-0.152941	1.38	0.198784
GEVIRCIEYTDCPEDMCHLPLVVVCHAHTCKCLRLVSLKINNPTLFQSLQFHLSVIIYF	-0.943951	6.42646	6805.1	0.538983	0.509831	0.976772
WFPPCVIDAHCPWNMCKDESNLPRCVEGECIC	-3.20247	4.50179	3696.3	-0.0875	1.13813	0.495772
LSGCITDEDCLKVWCKPICGMMCINFECKCIYPHDTSSMGT	-2.21704	4.82831	4577.42	0.214634	0.684878	0.895959
ATCVSHRDCGTHTCRPPLVPRCFNSKCYCGFNN	2.87414	8.68917	3688.23	-0.418182	2.1997	0.896791
LEGRELIGKYKCKTAKDCTCKKGDRPECLGRNCWCFNPPSSANKHT	4.79052	9.05877	5188	-1.02174	2.62304	0.771245
EEIENCETHSDCPHYMCTSPQTPWCMAYQCWCY	-5.11559	4.23993	3990.45	-0.712121	1.64121	0.0955611
ILECIFDVDCPTKKCSPPLVAKCDMYECYCRCP	-1.30523	4.86346	3787.55	0.145455	1.02242	0.285271
GAFSGCTNDSDCPDLFCLPPLDMKCHELVCKCI	-3.20683	4.35199	3576.18	0.251515	0.761818	0.330843
LTVPCQNAASCPQDFCTPPKFTRCINFICLCDDPEYAEPEYDSDDDFVSVKPKIKNENMMMIEREMMNEIET	-9.27499	4.10574	8346.49	-0.511111	2.07306	0.0402872
GRIRRSCEYDVDCRNIDCPPSHVGMCVWEQCGCLPK	-0.205185	6.71566	4126.76	-0.475	2.40917	0.0559929
TFQCHIDSECRNQIKCVLSRIAKCVRYKCDCVRLDAPQDPWSARPKRVDTYPIRRNAFL	5.79021	9.30104	6985.14	-0.559322	2.85322	0.0549023
HNCTTIFNCSSNHCSYHGVSLCMMGQCICIY	-0.0397798	6.96434	3471.02	0.370968	0.564516	0.262592
ARRKNFSLLILIFFITGICKWKCNSDAGCPNNHCSPPRIGKCVSKCCICMKPAWYPQS	7.76217	9.38088	6549.87	0.00344828	1.04293	0.570588
SYYDCHNDSECPNKIKCQLPWIARCIKLKCHCIHLNAPLTP	1.96127	8.31428	4770.62	-0.356098	1.40171	0.156447
LREPFSSFTEDPPCNQDTDCPSTFCVKPQVPRCIMFECHCKYIPSVLK	-1.20435	5.58279	5538.42	-0.33125	1.7325	0.392695
QSIPDVIPCLFSYECPTDLCPTDLTPKCINLTCQCSFEYDYYWD	-6.29307	3.5736	5144.82	-0.106818	1.07	0.110916
FRNPCKSDSDCTKLKLKCDRHTILMCFWRHCYCIF	3.87338	8.90332	4313.15	-0.302857	2.15029	0.751341
VTLCDSDQDCRRYICDPPEFPRCMRLICRCV	-0.29306	6.15944	3707.37	-0.206452	2.81194	0.026248
VIFCKSWFDCPKYFCRAPDYPKCIRYICECHILGIGTS	1.78691	8.31051	4477.33	0.226316	0.762895	0.0598844
YNITCDSVLNCASNRCILPAMPICVRNKCLCV	1.6998	8.34255	3531.28	0.65	0.777813	0.178637
MNVDRGDFLHYKCVRDIDCRRDLCKPPFKSRCLDMMCVCRLWMQ	2.79054	8.66203	5398.47	-0.363636	2.63273	0.106832
KNLTPSLLLGYQKFDKNFLHYLCIQDIDCRKDLCKPPFKPRCLDGSCVCRLWMQ	3.78545	8.85571	6406.64	-0.285185	1.56537	0.991873
GPIYDCHNDSECGKKIKCMLPRIARCINYKCYCVHVNAPLTPWRTRPKSVNKFPTRKNDFLH	7.95835	9.50502	7278.56	-0.672581	2.22823	0.366136
FGPCSSDSDCPSYLCGLNGIGKCVSFGCSCVDTTN	-2.29794	3.92992	3537.94	0.2	0.842571	0.456752
DSDIECRKKYIMCPLETTIKCVKDECICIH	-1.19544	5.58307	3531.21	-0.15	1.82467	0.0237189
DLDAYTDCETDADCPKIPCLFPLIKKCIENQCHCVPNSSTEPMSTIHNGVHKFHIVLAPNN	-3.94157	5.28379	6782.75	-0.257377	1.40115	0.202873
ANVHCHVDNDCEKQIKCVLPRVPRCINFRCLCGSTDKNRWSTRPKRIQKFPMMKNDFLH	6.96346	9.49842	7029.27	-0.711864	2.75644	0.266139
YVECETDADCQQNMCTWPFIVQCYKNVCICVHHTNPYL	-3.12109	4.72396	4513.16	-0.113158	1.11921	0.0366853
LKSTDMRMESQARRVAREFGPPSCNVDEDCNHYECRSPLMPYCSQNKCDCGN	-1.20045	5.6561	5973.68	-1.03654	3.24692	0.132407
DVVNCTTVLQCFTTYCYLHGTTLCLNGQCLCV	-1.21301	5.07518	3530.14	0.790625	0.004375	0.0404945
WRPGCKFSIDCPKDFCTHPLRAKCTWFKCFCF	3.7861	8.92109	3872.64	-0.153125	1.33906	0.0216775
NTHNCTTIFDCANNHCSYHGTSLCLNGQCICIY	-1.03866	6.24549	3665.09	-0.0363636	1.20758	0.200438
YSFEECQQDSDCPSVCTLPGCPNICTLPDLPTCIDNNCFCI	-6.31	3.25005	4503.09	0.0487805	1.14268	0.0428403
RLLIYNNCKQDSDCPNECAPDEDSKCITYACYCVDK	-3.29408	4.32994	4134.62	-0.686111	2.47278	0.022892
QSIPDVIPCHFNFACPASLCPTHITPKCINLTCQCISEYDLVD	-3.12078	4.63599	4751.52	0.334884	0.594186	0.835025
NYITDHIPCHSSRDCPRYMCPPPLSPRCIKFYCKCM	2.87226	8.65073	4277.09	-0.441667	1.8725	0.808823
QGYVAKKCILDYHCLPNMCPRGTEPKCVHKRCICW	3.87296	8.8868	4094.94	-0.317143	1.37457	0.818336
EFRFCLCDDDCPYDYCSPPKHRKCYWSSCYCENQGRL	-1.21795	5.54545	4532.08	-0.959459	2.80892	0.136002
QWPRCNVDSDCPPHYCPKGVMICERNLCHCFPMMD	-1.1208	6.00317	4126.84	-0.428571	1.74686	0.225098
DNGYFCFKDSDCPHSMCPTPLKEMCYFVQCACVMDTVA	-3.20883	4.35196	4300.98	0.0736842	0.962632	0.055479
LFECNRDFVCSDDNCESPFVVRCIHSYCKCFKSRNGFY	-0.207173	6.71419	4533.14	-0.273684	2.33211	0.414413
GIRCVKVSDCPKTFYCNVGTQVRCIKHQCKCIKIIEVIERICANMILYLVPDH	3.86598	8.78452	6096.39	0.313208	1.03113	0.0884839
KCDSDAECSEQYTCPLETVMKCQKDECVCLH	-4.20152	4.43416	3540.02	-0.567742	2.1971	0.0112934
GVTYFCYYDESCDEDCPLPFKGYCVDQQCTCKR	-3.2952	4.23319	3880.34	-0.572727	2.00545	0.0700033
KSFYPFNCQTIVDCKYKACHRPFIRKCIDYKCKCV	5.7811	9.21845	4250.12	-0.317143	1.78686	0.193265
SFTRCRNDVECPQYSCLRGLKMKCICFKCMCV	3.6907	8.82244	3766.6	0.08125	1.72594	0.0376098
DIIPGFCKLVSDCGDLGCTSPKVATCMFGRCYCW	-0.298949	5.99926	3690.37	0.485294	0.370882	0.707924
KKNFRPCKFNEDCTYYKCLHPEKPWCFLETCDCL	0.79154	7.76456	4203.91	-0.782353	2.06441	0.45266
NNEDVIPCLSSMDCPRDMCPIHLFPKCKNLVCRCTYYEDN	-2.20604	4.89159	4681.42	-0.3975	2.05675	0.0427184
EESQIYRCTTDEDCPEICVLPKIKKCVVNMCFCFIN	-2.28983	4.6568	4215.97	0.0694444	1.41778	0.530691
GNHTYWCLTVDDCDPNICRPGLIEQCFVFRCICKYDKK	-0.209852	6.70874	4498.22	-0.281579	1.75132	0.415407
YWKCTLDDDCPKNMCLLPQIAQCVKFNCECKFYFYVH	-0.21295	6.70409	4511.32	-0.110811	0.981351	0.332876
LIECKNDSDCPKNMCFAPQIPWCVNNKCECVSTYGPKYPGRKND	0.702676	7.75225	5010.76	-0.781818	2.02205	0.0949269
QLRCLEDFDCQRSDNCKFPRSWKCKDHICRCLLPLEV	0.794937	7.78173	4499.26	-0.589189	2.82378	0.027839
RGPIVSFHCQTNEACRSRFPNPYCECIHNLCQCQVDPQISANIADNLLAPELRT	-1.11532	6.03281	6087.91	-0.324074	2.00833	0.252389
GESWFCLKDMVCPHSLCFPLKAVCISNQCVCI	-0.210197	6.70126	3575.33	0.79375	-0.12875	0.591185
AFVECLVDSVCKDQIKCVLPRVPRCIKFRCLCGSNDPKDHWSTRPREYKNSLHYIEE	1.88373	8.3044	6726.81	-0.508772	2.3807	0.486321
VRIPCVIDAHCPWNMCDGSFVPRCIRGECQCWERLLQ	-0.204308	6.71404	4335.11	0.0351351	1.57946	0.0706345
LECRYDTDCPTYMCVPLIVKCINFICECKD	-2.29433	4.43751	3532.21	0.29	1.07233	0.0370365
IGLPSKCKTINDCKIISLWCPNDLLLQCINHWCMCAKLAFP	1.78612	8.32711	4648.67	0.47561	0.0678049	0.784621
LYECRSIHDCPHNFCAPLLITRCVNYTCICDDPTYGVPYTCIMREKPKIKN	0.867103	7.73871	5952.99	-0.205882	1.57235	0.0384835
LFIPECNRTEDCPNVCLYPKVRMCIWWYCTCIQ	-0.29558	6.14056	4041.83	0.142424	0.958182	0.0611579
YSFLIATQIRCLDDFECRRSDVCIFPRRWKCNNQRCECVLPLVV	1.70762	8.34234	5310.25	0.0136364	2.21273	0.340342
TCISNFDCMYLSCAYAQFQHCLRNQCYCIYR	0.784975	7.77627	3762.36	0.0645161	1.41161	0.79929
FKCKSDTDCHCPTPLKPKCKSTQCKCLTVWIGPQEFVPT	2.78693	8.6388	4399.21	-0.446154	1.36385	0.276763
AQCKSNYDCPRFMCTRYGVIVRCLKFVCKCAKY	5.69479	9.27161	3898.73	3.36e-18	1.56788	0.108016
GEVIPFHGCEFDMDCLLKKCFPGQVKVCSLGRCYCSDS	-1.20715	5.51602	4215.94	0.128947	0.983158	0.620587
SKRFCVYDEDCPPRMCMLPQVPQCNEFICDCGISPTTFLKQLN	-1.29334	4.86349	4971.82	-0.197674	1.57581	0.0904582
NSIPCKTHADCPKDMCELPQIVWCVVGFCECA	-2.20627	4.75105	3541.18	0.284375	0.568438	0.218844
GTPCNVDADCPQIMCNQFPNFNSRCNLGYCICVRMMT	-0.298082	5.92121	4160.85	-0.00810811	1.43297	0.443752
HDECKSKLDCPQNMCEYPSTVTCIDKKCICHRVRMIIPRFL	1.879	8.32044	4855.8	-0.329268	2.13073	0.190004
YFKCKTDYDCLSHYCPPGEAPRCANNQCVCIRF	0.787907	7.77237	3846.42	-0.451515	1.90848	0.144136
ISNRVRPPCVINADCPPDYCGGPYLARCIRGECKCFMALQ	1.70271	8.33357	4431.24	-0.0225	1.451	0.460051
FRSCNADADCPNDFCSSPEVARCIYIECYCI	-3.29234	4.10503	3508.95	0.0645161	1.79065	0.57808
EDNKDCKPMPCFYPKVKKCINMMCKCF	2.70866	8.71625	3245	-0.537037	1.57778	0.031019
LKPTDMDIESQVRRVAREYGPPSCKVDKDCNHYKCVPPFIPYCDENKCDCGN	-1.205	5.64788	5978.79	-0.907692	2.64519	0.0884138
EFYCLSVKDCPQNLCAGSPLTLQCLKFICRCESN	-0.29557	6.1406	3827.49	0.155882	1.04941	0.407583
VEDYKCKTDADCPKNMWLCPPAYIIKCIMEECVCIGFPYKLHFGPT	-1.20833	5.58266	5315.33	-0.00434783	0.596304	0.172931
DSNCTPYMCAPPLKPKCLIKRCKCVQVNLLDNFVPA	2.70783	8.74607	4023.88	0.0333333	0.946111	0.0104649
SFDKVISPHCHSDGLCEYFAPNRGCKCIHFVCICPHPSQFIHNTNTFLAS	0.138612	7.09558	5623.43	-0.002	1.1126	0.360925
FRMPCNYDFECSNSSCTPPYVATCMYDHCYC	-2.21108	4.53635	3652.13	-0.277419	1.57484	0.0705999
GESEPCNTDFNCPSSLCFYPLKFKPICTNHRCICKHI	0.87778	7.78829	4246.94	-0.297297	1.52622	0.394462
IKCQENYDCPRNMCPFGSRPICRYNICICDKLLPRIRPKGVHTPF	4.78788	9.12501	5297.32	-0.435556	2.12267	0.0835506
YGSKPLINPINCQTYSDCIYKACHRPLTRKCINYKCKCVEKVYLKNNSTLLESV	5.7826	9.15336	6258.37	-0.4	1.65944	0.479032
NYAYVNIVCKTNGNCPSHMCLFDQTPICHRGNCDCVKL	0.87328	7.78778	4275.95	-0.126316	1.36421	0.902555
HRTIFCLTKKTCPSSEVVGPCLYNGKPICIFFICMCPG	2.78667	8.66266	4208.13	0.534211	0.13	0.439428
HRECNSDGDCPNYRCLPPKVGMCHFTKCYCSLH	0.963254	7.79873	3815.38	-0.693939	2.22212	0.779452
RKPISRYCNTASDCTNYPCDLTVVCVAHECQCVHPQPTSTKKKHIPVSSIKY	3.95926	8.85641	5851.76	-0.482692	1.90904	0.0275903
HEKKKCKEDFECGLQICVSPTVPKCIVPFCRCRRPLLLKSGGKMWMQ	5.7904	9.27174	5452.66	-0.310638	1.54766	0.353413
KCDSDTECSKRYIMCPLETVVKCIKDECVCVH	-1.20534	5.58274	3679.35	-0.115625	1.85938	0.191154
FEECQQDTDCPTVCTLPGCPNICTLPDVPRCIDNNCFCT	-5.30901	3.65999	4309.89	-0.110256	1.59923	0.0700159
NIFFCNTDEDCTWNLCRQPWVQKCRLHMCSCEKE	-1.20348	5.55698	4181.8	-0.641176	2.45765	0.467782
KNIDAAGRRTCFRDSDCAKNMCPSYLVVKCVRSVCKCVRSDKVE	4.70195	9.1007	4955.82	-0.343182	2.73114	0.175814
YRECNSDGDCPNYLCPLHEVGMCYFSKCYCTRS	-1.20928	5.48232	3858.36	-0.542424	2.08939	0.651518
LYEPLYNFPKDPDCRRNIDCPSYLCVAPEIPRCIMFECHCKNILFDFYN	-2.20524	4.99949	5920.88	-0.230612	1.61612	0.0348902
SHVCDKDEDCIQICDPSEIIPNCWKNVCLCF	-4.20402	4.22839	3571.1	-0.00645161	1.42613	0.0955101
TFYCLSLNDCPQHMCSSPLTLQCLKFICNCVPV	-0.213007	6.69279	3722.46	0.60303	0.15697	0.917766
LEGRELLDGIKCDTDKYCQDVSDCDITKGEKSKCIDGKCWCDLPPPSANIHS	-4.20174	4.60839	5744.47	-0.684615	2.21442	0.0171151
TNCTTIIECAINRCIIPTTPWCLENKCTCL	-0.294692	6.10313	3372.02	0.423333	0.772333	0.0315362
EAIIECYNDSECQQKIKCVPPKVPQCIIYKCNCVLPYNPTNIWSIKSKILHRCHRRKNDFLDLKKL	5.86492	9.06721	7834.31	-0.457576	1.84045	0.866983
GSIPCMTSFGCPRSTCFPPSTPNCICGICECI	-0.306405	5.95636	3325.94	0.53125	0.309688	0.730533
QESPFHMCNRDEDCIEICDPSEIAKCILNVCFCF	-5.19854	4.19278	3953.54	0.05	1.60971	0.32181
QSNFYSLFIITWVYQCINDSNCPRNICSLNMKPKCVHRVCKCFPIVWGKYHVHT	4.95633	9.07976	6436.59	-0.0240741	1.09204	0.840219
VHIGCEDDQDCPRQMCPLSLTPKCLKHICKCI	-0.12179	6.87082	3628.35	-0.134375	1.44938	0.0908745
NFIKRRPSRCKSNIDCICPPSMMPKCIHTNCKCVTVWSGPKDFVYPPKID	5.78421	9.27172	5755.89	-0.4	1.787	0.577602
GKSLFTHISNFRIYHVPNNSSLLSNIPLCNYFKSGPIFCYNDDDCPKICNHPLVPKCHMFLCHCEEVEK	0.130457	7.08664	7973.22	-0.202899	1.27681	0.992296
YKCVEDFDCPDFFCQPPMERVCFYSECACVTHPIMANS	-4.20334	4.29058	4427.08	-0.00526316	1.27868	0.0958394
NTTNCTSHTDCASKICALPTVKWCASNKCICL	1.78599	8.33567	3431.01	0.121875	1.0575	0.132759
VCIPICRTYADCPSDMCTRPKHSYCVSYKCYCL	1.7742	8.24788	3823.54	0.0484848	1.30242	0.392956
SDMFMKSEGKEVEGTKPCKYDADCQPGCPREQHGCCIRGRCWCFSPPISANNIHGLRSQIASCFIR	1.8648	8.20223	7381.47	-0.55303	2.14682	0.254139
EFVSFHICKFDIDCPWQSCSPGNIPACIFGICYCVKS	-1.21008	5.37915	4158.87	0.524324	0.206216	0.47677
GFERNCTDDSECGYYCSDPKFGVCLVNKCICDYT	-3.29421	4.23321	3849.28	-0.373529	1.93471	0.139904
LLVCETDEDCPKSTCLPPQIPKCLRMICECV	-2.29064	4.51321	3481.21	0.245161	0.97871	0.0796323
DKINRCFTDAHCPLDMCPPGIKPRCRFTICKCISLM	2.78821	8.67523	4128.02	0.0111111	1.57778	0.0148296
YLPCKTVKDCPKSKCVYVCTNNLCRCIGLWPKIV	4.69481	9.07955	3889.79	0.2	0.640588	0.0497373
QHGLNPCETKKDCKCQKNKKPACLWKQCYCY	4.78281	9.04029	3690.36	-1.23871	2.23194	0.0171466
DFWNVCGHNSDCRSYPCDLGETRNCTSNRCICMYII	-1.20799	5.42767	4190.72	-0.366667	2.32306	0.930058
NLFPCKTDVDCLNKYCFHPFKPMCIVLNCECVLEY	-1.20926	5.48232	4143.96	0.288571	0.555714	0.581003
RLLLYNNCKQDTDCPNSCSPHEDSKCILYVCYCVDK	-1.21084	5.46826	4184.77	-0.5	2.11694	0.0159505
FDGCLSDADCVIHMCSSPQCRMKCVGFECICLI	-2.21687	4.65856	3628.34	0.736364	0.540909	0.265889
NDHVFCLTSKECHCHKCFAHEVPKCVLFLCACLTI	0.0432361	7.03262	3993.78	0.557143	0.416286	0.555272
INCTTALQCINNRCYLHGKSTCLNGHCDCV	0.874157	7.79652	3298.81	0.02	1.395	0.310592
VPPCIIDAHCLRNMCDPHFVPRCVRGECLCNWEGFF	-1.11712	6.0148	4178.93	0.202778	1.15639	0.0601937
QHSLLPCITYEDCDDDECSNPKTSFCFDKTCYCL	-5.2049	4.08718	3938.37	-0.479412	2.05971	0.0164414
QRGYICHTDSDCPRDMCPPNTKLKCVRRICKCVPIGWIKYYVLT	4.7842	9.07898	5175.19	-0.320455	1.83023	0.426599
NVHNCTTINDCSSNRCSSHGTSLCMLGQCICIY	-0.124844	6.86509	3579.06	0.0636364	1.49576	0.335117
KWACKKDSECPINICLPPMVAKCINKLCDCW	1.70075	8.31694	3554.35	0.0451613	0.700968	0.0164054
QHSLIPCKTNMDCANDKCLNYRMPTCVSKKCYCLSA	2.78411	8.63866	4083.84	-0.316667	1.68278	0.011585
NCTYTDNCVHTPCISPTLPLCVQDECVCV	-3.20808	4.02267	3171.65	0.344828	0.791379	0.0699135
VPDVLPCLFSPECPTDMCPTDLTPKCINLTCQCSPERDLY	-4.29121	3.95926	4459.19	-0.0425	1.194	0.0355876
RFFIYNKCKEDIDCPNLCAPHELSKCILYGCYCVEVF	-1.20746	5.55687	4378.15	0.17027	0.925135	0.478178
DTYALCFYDSDCPQDKCKNPQEVTRCIFPKCHCIKS	-0.210841	6.70801	4200.82	-0.619444	2.19889	0.397774
YDDCYNHAECTNKIKCVLPRIAQCVKYKCDCIRLNVPKTPWSARPKRVHKIPTRKNDFLH	7.95847	9.47123	7129.39	-0.743333	2.488	0.0510914
SGFISCKNWRDCPKNLCWPPRYPKCIFNYCECY	2.69861	8.63796	4035.72	-0.572727	1.67152	0.954671
YKQCRRDSDCPKNLCHSPQIVKCVYFICECV	1.78791	8.3186	3679.34	-0.293548	2.02129	0.0465087
YSKLFFICFFFNLHNLSSPFKNICISSFFISAFNECYDHTDCPIQMCGYPFKVDCDKYKCKCVYTG	0.851547	7.69316	7784.06	0.165152	0.744394	0.99106
KVICIEDSDCQKEKCWPIFKPSCLKGWCECI	-0.293626	6.23781	3633.35	-0.119355	1.06645	0.522027
GKPFHCTIFNCKVDQDCPQILCFGKQIAKCIDRMCECD	-0.218744	6.70223	4352.15	-0.102632	1.49263	0.473767
LEKRQCIIKLIKILEKDQCKEDWDCIRKSFLCPTGLVIRCIERICKCINILELKYFVPI	3.69918	8.76074	7069.68	0.213559	1.2422	0.281379
YIKCNTHDDCPKLESRVVVLRCTNNRCAAQLLY	1.8087	8.50441	3840.47	-0.287879	2.23	0.389843
NSSFTKFLDGYCKTYKDCPKVPRANVRCRKGHCIEI	4.8057	9.34146	4178.88	-0.686111	2.48083	0.0195448
NGDQCTSDADCKNKPNTFYTFYTYLCIYHECRCFIPMWRENC	-1.20916	5.51598	5095.74	-0.67619	2.21214	0.0342539
IKTAISCVSDNDCQQMFTPLVLKCIDNVCEFYM	-2.27633	4.22594	3773.44	0.4	0.793939	0.71288
RGKKTLFECIYDEDCPLALRPYVLMCVDKFCTWYWDDDIR	-2.27318	4.6646	4921.71	-0.3	1.86175	0.0652756
ESILVLQPCERDKDCVKVYKVNIRCRKGYCVEV	1.72515	8.47576	3886.62	-0.218182	2.14273	0.3279
EKMNRECSSHSECFRLYPSFRRGSFQCIKGFCKHSKNIKVKNICLLCINISSYLLILMVLLL	6.87544	9.41812	7257.76	0.2	1.19758	0.995748
TFPCNSDYNCPQFKLHFSECIGGFCEYHRSD	-2.1003	5.31299	3646.01	-0.629032	2.06323	0.609511
SYVLISCVSDNDCPKVALPRFLKCINKMCCIVRKKEW	3.70963	8.99592	4304.25	0.186486	1.18676	0.410463
VDIPCIVDEDCPILGFPMYSLCIDELCLLFFY	-6.2714	3.25006	3700.41	1.12813	-0.547813	0.0385327
RNIQTPYYCRFDVECGGTLKPLVLKCIDNHCVFTKPEI	0.810519	7.86986	4415.18	-0.147368	1.43211	0.575837
LFDKCRTDADCPTRYKFRKYQCLHGWCRYIRVKPY	5.80299	9.50655	4431.2	-0.934286	2.96857	0.0206024
YIECKTEVDCPRTFSMFFAIKCIKQKCATVGRYL	2.72123	8.84584	3993.79	0.102941	1.25235	0.0494843
IPYINSRPCVTDKDCPKVSQHNIRCRKGQCVDLSP	2.80701	8.89064	3971.6	-0.691429	2.61829	0.0843498
YIIECKTDDDCPISKVEIFAWKCVKNGCHLFDVIPMMY	-2.18822	4.89168	4469.3	0.215789	0.677632	0.187203
KLYFYSMLTRQCTYDDDCPQSMRKIGNGIYWYWCINNECRLHYGTIWYKH	1.891	8.43053	6279.18	-0.708	1.8628	0.0102673
ELIPCETDDDCPTSVNRKWVCINFICRKMCRAKIDEYQNQQNILTLCMKE	-1.2886	5.13935	5953.93	-0.484	2.3314	0.345699
DLKICKTDDDCPKIENLVYGYKCIASLCELVPLKIFN	-1.27639	4.93018	4219.01	0.12973	0.88027	0.0436031
MDIKYCATNDDCYKKKKPLFKIWKCVENICVLWYK	3.71568	9.00685	4332.24	-0.405714	1.25829	0.361356
KQTKIPCESISDCPYMHPPKVVKCIDGFCRIFY	1.80672	8.47738	3847.6	-0.154545	1.18455	0.0920098
TPCISDDDCLEAFLPPIMKCIDNFCKFKIQNIFN	-2.27521	4.35999	3937.63	0.161765	1.00382	0.173864
KTIFVAGYIECKTDADCPQDLQRSCYKCIDNICKRFRKLHYII	2.79704	8.70247	5114.02	-0.274419	1.98186	0.576078
GGKTHYSEIIECKFDADCPIGYKCVDEICKYEL	-3.18472	4.70085	3771.3	-0.330303	1.37212	0.0143131
APCITNTDCPYGGKCIERVCRFFMNYNN	0.721412	7.87118	3230.71	-0.335714	1.85357	0.240108
SHIPCNLELTSLKKPRDDIPCTYDEDCPKERQFFAKCVGKLCMYM	-0.196328	6.72997	5268.17	-0.522222	1.96867	0.132411
TTTTIPCNSEDDCPVMPLVVKCIDNFCNYFEK	-3.27352	4.10505	3641.17	-0.08125	1.38469	0.156765
GKIYHECTTDADCPIPRSTTSRWSCWNECIDNICRLVRVKHANSLMLNNIS	0.890891	7.83837	5866.7	-0.4	2.25667	0.235594
ARIPCVTVNDCPATILPVFYECINNFCLLNIE	-2.27377	4.13739	3599.25	0.771875	0.245	0.0162765
KETNIRCKRTSECPPQERPRYVMCIDGFCQIYN	1.72601	8.50292	3979.6	-0.951515	3.11879	0.0421476
GDFPCASDVDCPKEFSLVYYFGEKWTFIMKCIGKFCEATA	-2.2737	4.59459	4548.26	0.125	0.6305	0.794829
QYNIECKTDDDCQNYNSKIFGMKCIRNRCITGLLD	-0.277224	6.16944	4116.68	-0.7	2.65114	0.138789
IDALLKCETDIDCPEISVFSPFFYKCINNGCVHIML	-3.18634	4.42783	4092.83	0.602778	0.325833	0.192019
YIKCETDADCPKSTSTIFPMKCIKNRCKYHFLNQENII	1.80853	8.46466	4497.26	-0.502632	1.94421	0.155727
YPPCETVKDCPKSWCRLYRCENNECRYISFKTKGLGQIGRGAILSK	4.71212	9.17023	5313.19	-0.669565	2.18087	0.233946
GDPIPCRSHADCPIMPSIVVECIDSFCEFIYI	-4.18435	4.10082	3571.17	0.59375	0.4975	0.213737
NILTVFFFLFDNTAIRCIVDDDCPVAGKCIDGSCVFK	-2.27591	4.28313	4100.79	0.772973	0.547027	0.0775195
KNIFVLWRCRSVLDCPISLSGTYRCIGKRCRYKRLK	8.71556	10.321	4333.27	-0.241667	2.36944	0.0905646
LSGCLSDADCEIHKCGSNCRSKWMCLDFVCIKLKKVHKRFIWMNKLWENVNECSGYFLSTLYNKF	3.86693	8.75074	7686.05	-0.155385	1.35508	0.998378
VPFKPNISCITVNDCPKVTKPLRMFCINHCCEYDEGL	-0.198373	6.71858	4229	-0.0135135	1.17622	0.195145
KGIKTKYDCISDNDCEYAYIPNFVKCVDKFCEYYGRYDLP	-1.27928	4.98697	4781.42	-0.6425	1.93625	0.0195537
AFAGWIKCEKDEDCPQIFKYVRYKCVNNLCETFLVENPNV	-1.27202	5.05595	4728.45	-0.275	1.499	0.778922
TYSPISRPCIRDKDCPNMINYKVRCRKGICVSARLRYII	6.71669	9.84337	4603.52	-0.307692	2.4959	0.00534038
KSSEIEEPNSYLQGTSNFLNRKQNRVSLSCDKYPKICHIKGSAGPDCCNNKCVNFTIDMFNCGRCGKKCSFPKICCEGKCVNPRSNEKHCGKCGNKCDSRGSCVYGMCSYA	8.77754	8.87475	12258.1	-0.68018	2.25207	0.0542831
ELEIRCINDDDCPIFSPPLHNRCIDEVCHLLIS	-5.09226	4.37372	3823.39	0.0424242	1.76152	0.183262
YIECNSDDDCPKLESRMVVLKCTNNRCAAVLLH	-1.18636	5.51669	3754.34	-0.163636	2.0303	0.0281122
NLYIINLPCKTDKDCPKSSARHNIRCRKGRCVHI	5.89205	9.69559	3953.68	-0.679412	2.84235	0.0558193
AIPCIEDEDCNFVEGYLPWCVRNFCVKRIILKIKD	-1.27172	4.99627	4143.91	0.16	1.25086	0.049751
SIPCKTTADCPKAVLPDYYKCMYKVCCLIKV	2.70485	8.70234	3498.31	0.316129	0.321935	0.0381933
HECETDDHCPKSGNLFYVYMCIDHKCELGTAHI	-3.92301	5.23944	3810.28	-0.454545	1.63424	0.02756
YFTDDLCKVDLDCPQSSTHKYYCIDDECFLYMWGQLE	-6.18598	3.97909	4489.01	-0.424324	1.62	0.351726
EYIECKTDDDCPKSPLTGIGWKCIRNRCVYFDVVPYECKT	-1.2835	5.04613	4689.39	-0.5175	2.00325	0.0534423
YFECKTTNDCPKSVLRVWRCINNYCQSVRLRQLII	3.72039	9.20405	4264.02	-0.231429	2.21314	0.299761
YSPRPCRTDKDCPKFQGLNIRCRKGYCDNV	3.71882	9.16559	3534.06	-1.17	3.45667	0.0139181
AEKTSIPCVSDDDCPKVIKPLILVIKCIDHVCQYYLEGSYKGYSRAIKTRK	2.80677	8.75808	5789.82	-0.207843	1.48294	0.0207469
EITNISCVSYDDCPKVIQPLIIKCIDHFCEYFLGS	-3.18734	4.42784	4007.66	0.394286	0.608857	0.0123555
YKTSITCGNHSHCPITAPPNVIKCVDHRCVFFGPDGLPLKYVPRP	2.97925	8.86849	4979.83	-0.171111	1.10022	0.0701581
GENMSIECALDADCRKLYPSNTFVMKCHDGYCVSISIISLYSLDLIILMEIKQKVVKQFKKCIKNYYIFY	1.79669	8.31446	8183.74	0.195714	0.803571	0.615358
DDDCPEALPPQFPKCIHNVCVYFVEE	-5.17263	4.01463	3008.39	-0.269231	1.36731	0.0450085
NDDDKNSHDMEDEEEQEYYVLDTHHGSRSRFLATIIKKGRQCDRETNNICDGVRANKGRDLLLCCKKHCRNVLSDKNNCNVCGNKCKQGERCCNGVCTNVLSNVHHCGKCKKECSNDDPCGNGFCGYA	0.145599	7.07385	14394	-1.01641	3.11187	0.0696722
HHRCKIAADCPVHPYGLGVKCVRRMCIYNVKISESMNTRP	4.98092	9.43664	4584.46	-0.3075	1.94025	0.0141379
LNPYLGRLCKTDKDCTKIQNYNIRCRNSYCVQI	3.71672	9.13228	3937.58	-0.672727	2.60091	0.00915186
GRTYIECISNADCPLAQPPYVLLCIDKFCTYFRDDDLP	-3.2751	4.17149	4370.01	-0.0447368	1.39	0.18131
INPFMECTSVSDCYRIYPLVPYGSMRCVKGRCKLLKDVKVKNISLYSRNHSSYLLILMM	5.80269	9.42369	6879.29	0.1	1.18017	0.393399
GERECDSDVECKENYPGPYNHLLKCINGYCNIHFNFPP	-3.09668	4.96907	4416.9	-0.871053	2.09	0.176638
NISIRCTVDDDCPVGGKCIDGSCVFK	-1.27703	4.57751	2745.15	0.153846	1.50423	0.324005
RNIPTPFTCWSDLECPATKYPLVLKCIDKHCVYTMIQE	-0.189471	6.72558	4458.26	-0.107895	1.08526	0.0168629
EHSECETDADCPLSMDEYFVLKCIDKKCEWVARVQ	-5.1778	4.39536	4121.65	-0.5	2.198	0.112142
EEDKECVSDADCYDLFPGLHRAVMKCINGYCKLHI	-3.09724	4.96239	4016.61	-0.265714	1.654	0.0895452
ARIPCVIDDDCPPKILPIIHKCINNFCKLKLWN	1.80703	8.5047	3834.68	0.169697	0.827273	0.15587
DDVKTIDCKTSSDCPISVLGMYTWLCIERICKLFKVNSGN	-0.277214	6.16944	4497.25	0.055	1.308	0.30136
LRTRIECSSVSDCYRIYPLVPYESMSCVKGFCKLLKDVKVKNISL	3.72034	9.07507	5186.21	0.104444	1.39222	0.0499823
GKNLDKIYGHLCISDLDCYLRNPHYPLGLIDCDKGYCKCFCKPC	0.861746	7.73118	5039.93	-0.243182	1.20114	0.497426
DENHHLPCVNALDCYMRNRNFPLGIFNCKGGRCFYFNKPF	1.89587	8.50576	4752.46	-0.5	1.97075	0.603572
EEECKIIADCYIKYPVLRGIVVKCVEGYCKAILYRRVYLGSVTLFTNSL	1.72384	8.43898	5633.73	0.422449	0.698367	0.00631203
ERSCVSYADCYKIYGVRHNGVWMCAKGFCKLVITGHIK	3.89176	9.10295	4337.14	0.0578947	0.982105	0.12761
TKIPCVFISDCPHQLPPRYVMCVYGFCRIIGSI	1.80578	8.51917	3757.56	0.642424	0.212424	0.0886233
RQTDIPCKSHDACPRVSYHYVECVKGNCAYGNWIR	1.89487	8.49184	4070.61	-0.702857	2.37514	0.00483866
KTIPCVIVSDCPQHIYYLVECIDGFCDYWRD	-3.18904	4.35199	3695.25	0.151613	0.989032	0.00592871
IYFRKPPSCITDKDCPQPTNNIHNVRCRKGKCIQIHKLTP	5.89106	9.62094	4664.51	-0.83	2.473	0.0776999
EDTICEIDADCPTSWHEYFIFKCFDRKCKWVFRF	-2.18343	4.99956	4279.89	-0.347059	2.05441	0.100696
LRNINRECTQTSDCYKKYPFVPHGKMRCIRGYCKLEM	4.80738	9.34095	4483.3	-0.824324	2.65568	0.0248896
KRTNIPCFSDDDCPKTSPPLVLKCVDYFCKYFREKNLI	1.72078	8.46308	4498.27	-0.468421	2.05368	0.663988
GRVDMPCETDADCRKMEDHYFELKCVDHICQWVVKIK	-2.09613	5.4558	4442.16	-0.524324	2.29297	0.0109397
ERECVSDAVCYEKYPGPFNFIIKCVDGHCKAYPKLVKNNISLLCLSLLFSLLIIMLSHLFSLLIIK	1.88662	8.3585	7519.13	0.704545	0.00515151	0.962154
YVWCATVKDCFESQYYIYDCINNQCINVGKNPKALVFPGLPRDQVTITT	-0.280333	6.13275	5633.47	-0.0857143	1.08837	0.0181233
LPECISDADCPKGTRGRTYKCVSGKCRYPKLWKKIERSTEKE	4.72495	9.26881	4861.65	-1.13571	2.99048	0.16427
TFRTRLPCEKDDDCPDAFLPPVMKCVNWFCEYEIPE	-4.26679	4.28543	4308.94	-0.480556	1.98861	0.207107
EITNIPCVTDDGCPKLIKPLVIKCINNFCEYFMEDKYDGP	-3.27258	4.38591	4580.34	-0.145	1.1255	0.0126593
AIPCGTKDDCPKIPIHMCFNKICVLLR	1.80691	8.51933	3029.75	0.388889	0.597037	0.0458941
VSHPCSTDKDCPKVKYWFILRCRKGRCVYM	4.80389	9.3854	3620.35	-0.436667	2.101	0.486649
TYMPIPISRSCITDKNCPNFHNSKGRCRKGFCIGVRIR	6.80475	10.1018	4370.17	-0.481579	2.50368	0.00405973
RNIETSFTCRSDVECPTTLYPLILRCINNHCVYTMINE	-1.1848	5.52891	4464.14	-0.0815789	1.89711	0.333515
KKHRYIECVTHVDCPQMFMPPFIMRCVIHRCKIFNIEDLE	0.988667	7.89655	4921.93	-0.0775	1.635	0.072331
GKKLGHPCIIDLDCFLVIPHFPLGLVDCKEGHCTCFNRPC	-0.034616	6.96939	4440.32	0.3075	0.49775	0.78652
ELIGCETDGDCPKSWIKLWDKKYMHRCINDICEWVKKLR	0.813573	7.85838	4754.6	-0.666667	2.07795	0.353532
IEDIECEKDVDCPRSMIKMWNKNYRHKCIDGKCQWIKK	1.81257	8.45236	4685.51	-1.05	2.81474	0.0891294
KNDGSIECIDDSQCPQIFMPPFVIRCINFRCQIVNGED	-3.27042	4.23322	4345.96	-0.168421	1.87737	0.421815
SSIPCNSDKDCLWKIYHTYTCEDGFCEYVPIIYRIWY	-2.19035	4.82842	4526.15	-0.240541	1.24	0.00551535
VNPMLVGKCKTDKDCPKYHGLNIRCRDGFCVPI	2.80602	8.86768	3721.45	-0.284848	1.6297	0.609029
GARCITDDECPVGEKCIDGSCVE	-4.26872	4.01768	2399.66	-0.195652	1.97217	0.0194816
ECTNINDCYSLYPHLLHGSMKCVKGYCKLRKDIKVKHIYLLCLNISSYLLILMMLLL	3.96617	8.90391	6677.2	0.477193	0.197719	0.950494
KEPTKDPCVFDSDCRKVVLPLLLKCIDGICQFTLVPSKFD	-0.276093	6.20003	4512.38	0.1225	1.124	0.0467338
HECNTDDDCLQTSNLFYVFMCINHICELVNKYP	-4.09917	4.41861	3923.43	-0.163636	1.49879	0.290659
DRIPCVSRDDCPKRPYPLFMKCIDNFCEIWRIGKE	0.726566	7.86533	4244.99	-0.585714	2.562	0.412276
QECNIDADCQLIFPGPDQHILKCITGYCLIFPA	-3.18815	4.21921	3680.28	0.315152	0.400303	0.0718927
RSFPSSFVSPKSYTSEFPCNSNRDCPYELYYESKCVDNLCTYW	-1.27584	4.93872	5114.64	-0.744186	2.26651	0.175182
GYLPNSGPCITDKDCQQVKGYIGRCRKGFCLQRVKRLMSSFS	5.71671	9.61991	4741.56	-0.47619	2.10048	0.582223
RTSVPCISDSDCPETTFTKLWKCVRGFCEVTVKETNPKCFVCPKDVISELRD	-0.288604	6.32228	5912.84	-0.276923	2.04769	0.207455
IYHYMECGSSADCYSIYPLVPYGSMRCIKGCCKPLKDVKVNNIHL	1.881	8.35843	5114.05	0.00888889	0.799556	0.290645
FKTSIPCVSDDDCLKMFTPLDLKCVDNVCEFNL	-3.27409	4.17149	3754.38	0.20303	1.18636	0.469798
RLKTCNTYADCYYKMGPPLDGVWECVDGFCKPIFQR	0.720656	7.85249	4218.91	-0.391667	1.49917	0.225568
VRQYYSECTTDADCKKVVSSHTKWFSWYECINNICTLMSVKYPSPIVIP	0.807532	7.85201	5735.62	-0.161224	1.24857	0.0565458
QKTKSPCKTSNDCPKSIRPIFVRCLGGFCHYAVGKLKR	7.80177	9.96668	4268.1	-0.507895	1.99026	0.320608
EEHFVTLYRKKEVCVTDADCRKQNPNNKHFMKCVGGDCVSLSTVYRHSTSKQEQPGMNTVMSENSIRDVYMIHNLQESQKQFYIKLWKYEKTN	3.07833	8.70371	11023.5	-0.917204	2.56806	0.052348
VYIHCETDADCPQIVDWWYVVKCVDHKCELVRKIL	-2.10006	5.37597	4220.95	0.122857	1.06714	0.040414
AIRTVKTSIPIPCASDKDCPEVSHPLLLVCVVDVCEYLFEY	-3.18454	4.58206	4567.37	0.512195	0.548537	0.0774128
DDDEIIIITCITDADCPDISNLFPLVYKCIENICVDVRLQPPYDTLHKRHARRNE	-5.09179	4.60056	6414.31	-0.298182	2.25927	0.0124518
KRECIGDTDCYKKYIHLRDFKSRCLWGSCYTLFNNGAIHKKVIKSI	5.891	9.42425	5453.4	-0.48913	2.03261	0.769661
VEIPETPCVTDADCPYYSPSLFAKCIDNFCVLFLS	-4.27352	3.76913	3901.49	0.494286	0.376857	0.307444
VKIPCVKDADCPVLPCPLYSKCVDNFCKMLSI	0.708964	7.80517	3543.35	0.540625	0.23875	0.080758
WSKIILCVTEFDCYTKYPMHADRKMECIKGVCYRA	1.80852	8.46452	4203.01	-0.14	1.40771	0.0367079
KSKCKVDDDCPQRFVIYPLMFMCINSICRLVNE	0.722654	7.86499	3909.69	0.0545455	1.59758	0.00387736
EKYIKECDTDADCHVKYRGSFQHLLKCINGYCEIFDD	-3.09812	5.00187	4400.94	-0.675676	2.31432	0.00944248
FMECETDMECPKNQLKLFKWKCINNECVWLDWRPRRV	0.729955	7.86577	4690.53	-0.72973	2.40919	0.00994549
YPPCVTVDDCPKSYLRIYRCENNECRYRAVPFRNEIYGY	0.724128	7.84687	4767.41	-0.782051	2.7441	0.0131256
VDDNLFFSSFSISVIQPCVSDADCPEGTRGRTYKCINGFCRYPRIWNKF	0.723755	7.86502	5654.41	-0.244898	1.97245	0.249409
QSYECETDDDCPKPMKHSHPDTYYKCVRHICQWVWR	-1.01389	6.27469	4486.03	-1.30556	2.98	0.0891931
RISCVSRDDCPKRPYPLFMKCVDNFCETWMIGWE	-0.273546	6.21479	4126.83	-0.361765	1.98735	0.324294
PKRINKFFLFDNVVRIRCVIDDDCPKVIKPIVMKCISKYCCYFVDGRLF	4.70817	9.17023	5860.13	0.279592	1.33367	0.0366249
EHENGRLCVSSDDCYKKIPGLRNEIMRCIDGYCKVTVV	-0.185559	6.7363	4345.02	-0.376316	2.22474	0.0290444
QVKCKTVKDCPIRRNRKYYCLFGECKYDVV	4.71753	9.3031	3656.36	-0.64	2.563	0.195087
YIIRCVRDIDCKHQHPFYPYPSHCKNGICVFEGYSLSPNPYNGEAC	-0.0270313	6.9759	5336.05	-0.486957	1.57978	0.0342068
NSFHIFSFGCETGKDCTKTQLKSFKWKCINNKCSWLDVRPCRI	4.79681	9.22943	5070.92	-0.47907	1.98419	0.00774373
DLSFDKCRTVVVCPTSSQFRTYRCLRGWCRYT	3.71969	9.24852	3848.45	-0.36875	2.73687	0.0675686
TLVPLKPCKTDKDCPKYFKGNVRCRKGYCASI	5.71473	9.50835	3633.36	-0.56875	1.91906	0.0823089
YNGGFPCIRDKDCPKFHGRNIRCRKGYCDNI	3.806	9.16579	3647.19	-1.03871	3.15323	0.0777038
LACITDADCPYRGKCVNGFCRFNMKSNSN	1.71972	8.51784	3228.7	-0.351724	2.12552	0.00755468
ELDWIYYLCDTDADCPSHWSKFFIYKCVNHVCDSISKTP	-3.10273	4.79607	4644.24	-0.235897	1.33205	0.16777
ADPIFCKSDADCPKESYPLFVKCIDNFCDFIIV	-3.27508	4.17149	3757.36	0.336364	0.827273	0.262874
KNIDGAFWRCRSVFDCPISLYRKYRCIRLQCRYKRLK	8.71568	10.1651	4656.58	-0.621622	3.07459	0.021505
KQTKIPCKSISDCPYLNYPNMVECIDGFCRIYHRS	1.80671	8.47725	4123.81	-0.468571	1.92514	0.0565853
RSFPSSFVAPKPYTSEIPCKSNRDCPYELYYELKCVDNLCTYW	-0.276841	6.24845	5114.81	-0.565116	1.80233	0.116849
SLTFLYSFIFPITTYLKCKTVKNCPISDCVYVCINNECRVIRIKLVGF	3.70751	8.97471	5567.73	0.66875	0.411042	0.60567

## Sheet: M. truncatula
Peptide sequences	Charge	Isoelectric point	Molecular weight	GRAVY hydrophobicity index	Boman index	Antimicrobial potential probability
SDMFMKSEGKEIDAECDITSDCHDCAKGFHKLCSFGHCYCITGPPAKPEQNILDVKDGGI	-5.02569	4.83503	6537.39	-0.411667	1.59583	0.0305189
IPCNDDVDCPQTLCEQLIADFKYMIDFKSECVSRMCACTGSPV	-4.29109	4.09013	4790.54	0.0953488	1.3214	0.43892
GREYCNKDSDCHREKNPDCNLYIACVAHECQCVHLQSALTEEIPIRAPLFKH	-1.93822	6.03284	5999.8	-0.605769	2.29904	0.795084
LNGHGRNRCFRDSDCPKVMCPSYLVTKCFKKHCRCRKPGLQVQLNPK	8.87024	9.81569	5463.5	-0.802128	2.65021	0.267954
GIRCRNVYDCPKATYCRAGSHRVQCIKHQCKCVRIFESIDPA	4.87505	9.12518	4826.65	-0.397619	2.43857	0.0235339
GMRCNHVSDCPKDTFCWLDSHMQCIKHQCKCVRIFEPIDPA	-0.0335053	6.97045	4793.6	-0.360976	1.90415	0.154383
KWPSCKEAIDCGINFCIRPFKAKCMMFTCFCVQNP	2.70062	8.66208	4060.93	0.174286	0.784286	0.131166
VRIPRPLIDPLNCHIDIHCIYKECRRPFKPSCLNFKCDCGKE	2.87899	8.65065	4971.93	-0.388095	2.13857	0.19547
LDRKRPIGKKFPCKADKDCGCGNGERPECLGGQCWCFSPPSSANKHT	3.79083	8.88637	5123.87	-0.982979	2.42766	0.13621
GIRCVFPSDCPRTMRCLSEFHLTCKKKQCKCVKMFDPINFVTA	4.7879	9.1256	4983.03	-0.0372093	1.6107	0.378142
REKVNCLDDADCLEVSCLNGSNAECVGNSCVCVFVFYRENFDEQFRR	-4.28281	4.40031	5398.01	-0.265957	2.53489	0.872091
FRCLRNLDCPDSMCSSAYTPRCRHRTCVCLNNDEIKIL	1.79199	8.34419	4448.18	-0.328947	2.75789	0.251091
GRYTTPWCVRDIDCPKEKCKHPFKPRCLTHSCVCRLWGSQDVI	3.87618	8.90315	5063.95	-0.569767	2.21767	0.037393
QNIDGNTGGNRKCFRDSDCPKFMCPSYLAVKCIGRLCRCGRPELQVELNPK	3.70463	8.90241	5732.67	-0.621569	2.42412	0.418837
RREYCNKDSDCHKEKIPECHMYIACVAHECQCVHLQPAFTEEIPIRAPSIKH	-0.850353	6.546	6109.03	-0.640385	2.27077	0.442174
VLPYITVSGDPIHCINAYDCPNVCVDFLISRCINNKCYCM	-1.21277	5.29569	4511.32	0.5225	0.532	0.592411
AYVTRFWCYRDLDCRKDMCKPPFNPRCHNHICICRLWGLYEK	3.87517	8.88628	5252.19	-0.578571	2.32786	0.299446
KILEKHTNKCAATVGLDIYEKDKCVTDFDCVKNLWLCPIDQFVRCIDETCKCILF	-1.21488	5.64755	6384.54	0.0690909	1.27764	0.270183
KDDCLVDADCVTLVCEFDERPQCVINTCRCRPLRFSGFYYEQLH	-3.20113	4.70246	5201.93	-0.234091	2.28023	0.713675
KILEKHKCVTDGVEILEKGKCFTDWECVRNSWLCPVDLVVRCIKETCKCIKILEPINVVPT	0.790182	7.72475	7017.43	0.114754	1.1141	0.0446229
LNGHGKDRCFKDSDCPKYMCPSSLVAKCIKKLCSCRKPGLQIQLNPK	6.78222	9.38532	5253.3	-0.559574	1.85191	0.992397
HACTVNADCEQSMCDPFCVGGYHFTPICVIGWCVCVGNRVAPVL	-2.13081	5.21189	4716.51	0.679545	0.0945455	0.766025
SSFTRCRNDVECPQYSCLRGLKMKCICFKCMCV	3.6907	8.82244	3853.68	0.0545455	1.77667	0.0419742
TNFERKQISFSFFMKEYWPCVTDDDCPSDLCKKVDQIPKCVGGLCKCFPIRFGQWER	0.707708	7.75283	6771.86	-0.45614	1.90737	0.926728
SDMCMKLEGKGVEGTHPCKYDSDCQPGCPPNTHGCCIHGRCWCFNSPIFADKIPGLIPQGNCFIR	-0.0623958	6.94857	7115.23	-0.343077	1.31846	0.468173
EEDCFVDADCVNLILCDFDEKPKCIINICQCFPWTVIH	-6.20009	4.02331	4433.14	0.357895	0.891053	0.027425
AIPCITDANCPCVFPLKPRCNFGYCICEEMIP	-1.29457	4.67895	3562.29	0.49375	0.300312	0.0738492
GLFRCKVDIDCPQILCFDEQIAKCIARMCECDYE	-3.28941	4.38588	3972.67	0.126471	1.56941	0.062116
GIRCHDVSECPKGLYCNVGSHMECVKHQCKCIKNFEPIDLA	-0.0321139	6.972	4606.38	-0.239024	1.47244	0.0345032
QHPFTPCETNADCKCRNHKRPDCLWHKCYCY	1.96226	8.32226	3798.34	-1.2129	2.87871	0.0129344
QIRCNDAFECRRSAICNFPNKWKCNDHKCECV	1.79271	8.33552	3832.4	-0.80625	3.09875	0.10132
KRGGKDKCFRDSDCPKHMCPSSLVAKCINRLCRCRRPELQVQLNP	6.78899	9.54951	5188.15	-0.837778	3.11289	0.673359
ARGYLCVTDSHCPPHMCPPGMEPRCVRRMCKCLPIGWRKYFVP	4.87493	9.15183	4993.05	-0.25814	1.51744	0.11068
LERRELFGIKCNNDAYCQSVSDCDIHKGEQSHCIDGKCWCFLPPSSANKHT	-1.02988	6.28075	5785.49	-0.670588	2.27588	0.983115
AKEEVNCLDDADCLEVLCVFGSKAECVVNICICVPPRFGKFDEHFR	-4.19661	4.59834	5162.98	0.217391	1.3263	0.632353
YCLVDADCVTLVCNFDEKRKCLRSTCVCRKFRFTGFYYEQLH	1.79082	8.31041	5074.92	-0.109524	2.05452	0.158083
QKIRRCFNDAHCPPDMCTPGVIPKCKFTICKC	3.7861	8.92109	3654.44	-0.25	1.685	0.394854
IRNKCFRPSDCPPSMYCDAGFQIGCVRKICTCLRILAPIDFVPT	2.70102	8.67447	4949.94	0.25	1.23205	0.468456
KWPSCKEAIDCGENFCISRFRVKCWRFKCFCIL	3.70341	8.92064	4017.84	0.030303	1.57606	0.0137433
QNIDSGGNRRCFRDSDCPKNMCPSYLVVKCLRSNCKCVRPGLQVRLNPN	5.7	9.37772	5556.45	-0.67551	2.86531	0.748652
SNYHEFMICKKNADCPRFMCIPPEKPKCVDLWCKCI	1.78973	8.31062	4292.18	-0.275	1.36139	0.738588
TATFCHDDSHCVTKIKCVLPRTPQCRNEACGCYHSNKFR	2.96324	8.66361	4471.12	-0.620513	2.55282	0.0693158
NRFLYRIGCDTSNDCPSYMCPPPLSPRCTKFYCKCI	2.69791	8.64957	4193.94	-0.341667	1.82583	0.523726
IIRCFHDADCVHKICHPPQIRKCVSKICKCRLMITQKDYVLT	4.95956	9.1017	4958.05	0.0452381	1.57405	0.049112
FPCKTNSDCPSYLCHYPKNPECVERECICW	-1.20658	5.52824	3566.09	-0.613333	1.863	0.108832
HDCHNDLDCGDKIKCVPPRIALCINYKCYCILENDAVIPWST	-2.12155	5.33534	4793.56	-0.0809524	1.32048	0.0803528
FRNPCKSDSDCTKLKLKCDRHTILTCFWRHCYCIF	3.87338	8.90332	4283.06	-0.377143	2.29086	0.61278
FLFYIADFWNVCAYNSDCQSYPCDLGESRNCTLNRCICVYNI	-2.29715	4.22593	4938.59	0.121429	1.28024	0.601184
SCFEDSDCPYDMCYAGFQPKCVNGWCDC	-4.29501	3.71	3187.54	-0.321429	1.44464	0.130893
NCIPMIHPLLYKKRVVPNCQTIVDCPDNMCTHPKEVYCIGYRCYCLK	2.86218	8.54467	5517.66	-0.0638298	1.09723	0.0216245
NEIEHCETHSDCPHYMCDSPQTPWCMAYECWCF	-6.0263	4.3404	3997.44	-0.663636	1.70636	0.108982
ERFGPCSSDSDCPSFLCDHDGVMKCFSNGCSCVDPSD	-5.2036	4.03707	3948.3	-0.37027	2.15973	0.692085
DVVNCTSVLQCFTTYCYLHGTMLCLNGQCLCV	-1.21301	5.07518	3546.2	0.86875	-0.123438	0.0965851
QYSSCATKEECKCPDNKRPACLWKQCYCY	1.70043	8.30077	3449.97	-1	2.35931	0.058772
NVHSLLPCGTDDDCANDPCIHPEYPHCHMEQCHCV	-5.85433	4.78731	3934.37	-0.511429	1.746	0.0141041
ESFHPCKINEHCTTYKCLLTGQPWCFMDFCLCMYFN	-1.12221	6.00676	4355.11	0.0194444	0.714444	0.955681
CFEDSDCPYDMCYAGFQPKCVNGWCDC	-4.29501	3.71	3100.46	-0.303704	1.37222	0.126952
VSILCKRNSHCPKYMCSPPLHQECIRNMCMCL	2.87484	8.6759	3739.58	-0.0125	1.33937	0.0640912
ETKLNCIDDSDCPYDMCDPGLLPRCLNGWCDCSRFQPWPMDSMSSNLREFTLPN	-5.28787	4.08159	6232.04	-0.587037	2.17926	0.136383
DLSPCLRSGDCSKDECPSHLVPKCIGLTCYCI	-1.20896	5.42762	3457.04	0.096875	1.15125	0.129842
EAGEREEITPCNTDFNCPSSLCTFPLKLLKPICTNHQCICQHI	-2.1146	5.41977	4848.59	-0.216279	1.47977	0.300286
SIPCKTRTQCPEKMCRLPKFVWCIDGSCVCA	2.70161	8.67478	3504.25	0.0774194	1.24419	0.0957345
NGIPICQTYMDCPSDMCTRPKHAYCVSYKCYCV	0.784107	7.76778	3794.46	-0.148485	1.20455	0.150086
LNFGPCNTHEDCQKYEYTYSCVMECVESVCDCWSNEIVDFIFPRN	-6.19872	4.11656	5332.94	-0.32	1.77867	0.880334
EFYCLSIKDCPQNLCVGSPLPLQCLKFICRCESI	-0.29557	6.1406	3864.64	0.444118	0.542353	0.550261
DLINGGSVPCLTSFGCPRSTCYPPSTPNCILRICECI	-0.296392	6.02991	3931.6	0.340541	0.760541	0.606325
LSGCITNEDCIKYQCSAENCMVCINFACKCKYSVF	-0.307459	6.13339	3932.62	0.342857	0.797429	0.668829
QHSLIPCKTNMDCAKDVCLNYKFPTCVGKKCYCLSA	2.78312	8.62749	4026.81	-0.05	0.987778	0.0625048
AQFLCSDDSDCPRDLCVRNSLTLRCVNYICQCR	-0.29586	6.05871	3811.37	-0.130303	2.62667	0.48607
YDDCYNHAECKTKIKCVLPRIAECVRFKCDCVRLNVPRTPWSTRPENAHKPYKEE	2.88342	8.60631	6555.57	-0.907273	2.81127	0.0256712
FRDPCNFDFDCRNSNCTAPYVATCMYEHCYC	-2.20897	4.65858	3690.12	-0.416129	2.24903	0.128698
CKTRVDCPVDMCELSQIVWCIDGSCKCL	-1.29514	4.68433	3148.77	0.396429	1.02857	0.187442
EFENYCTKDSDCESYCPNPKYGKCLDNKCICQLIWMGYG	-2.2955	4.59458	4563.17	-0.694872	1.70103	0.194739
LIFCFEDINCPFDKCFPQLPKCINSFCECV	-2.29344	4.31666	3517.18	0.546667	0.438667	0.0312581
ASNPCVSTRDCTTHTCNPPLVARCINLRCYCGYK	2.78596	8.67519	3761.36	-0.226471	1.93794	0.70884
RPCNNVDDCRKHMCTPYGQLVRCINSTCECVLD	-0.207985	6.70777	3787.37	-0.427273	2.55242	0.76059
FKMFCRYDEDCPPRMCRLPQVPQCNEFICDCGMPVYKPYQNKYIKK	2.70066	8.60521	5627.68	-0.715217	2.07174	0.468998
LLLIKVRSFIPCQRSDDCPRNLCVDQIIPTCVWAKCKCKNYND	2.70015	8.6496	5013.96	-0.104651	1.76907	0.512263
YDDCYNHTECTNKIKCVPPRIAQCFRFKCDCIRLNNGPKTPWSATPKRVHISPTRKNDF	5.8743	9.24312	6928.98	-0.884746	2.73542	0.0388332
LLVCESDEECPKSTCLPPQIPKCLRMICECV	-2.28895	4.58516	3481.21	0.241935	0.943871	0.10516
GLINGGSVPCLTSFGCPRSTCYPPSTPNCIRRICECI	1.70248	8.35162	3916.59	0.2	1.03568	0.153715
DSILCTTHAQCPGDMCELPQFVWCVVGFCECI	-4.20427	3.91299	3549.16	0.69375	0.0478125	0.215841
EDIENCETHSDCPHYMCTSPETPWCVAYQCGCY	-6.11447	4.07205	3816.18	-0.627273	1.72848	0.247284
HFQCHIDSECENQIKCVLPRVAKCVRYKCDCVRFDAEQDPWSART	-0.116078	6.87938	5329.08	-0.593333	2.698	0.0181673
AYFECHSDSACETTVKCVLPRIPRCIKYKCLCGNGVGKRWSTTPKRIEKGSTVRNGFLH	6.87655	9.41763	6646.77	-0.413559	1.97305	0.507281
LCDSNRDCRGYHCNWPKFPICVRMICECI	0.790894	7.78566	3476.12	-0.12069	1.93241	0.156808
LDCHSDHECYNQLSCIIEEICLDGSCHCPPIL	-6.02699	4.2798	3604.09	0.103125	1.09719	0.0986026
VTICDSDQDCRRYRCDPPEYPRCLGILCKCVYVSG	-0.296047	6.15761	4027.65	-0.3	2.31114	0.0189413
EPGGHRCSTDSFCPPNMCPPGMTPKCVRFRCKCVPIGWKNLSHVLA	3.87595	8.94032	5059	-0.265217	1.34261	0.715913
GESWFCFQDMTCPHNLCFPSKAVCISSQCICI	-1.2092	5.31892	3599.22	0.4875	0.370625	0.624094
ENICDGDYDCNPNEWWCPPNYVLKCINYQCSCIGFTPAIYALD	-5.2942	3.65999	4965.56	-0.24186	1.04512	0.339236
TSFCDSVKDCREPAFFCEPPKIARCVMLFCRCD	-0.292349	6.20277	3818.51	0.0757576	1.86424	0.081266
QIFPKWCLYDKDCPQNMCRPGRIPKCIFGHCNCVKQRS	4.78509	9.1256	4514.38	-0.605263	2.06789	0.957538
KVTVCDSNHDCRSYFCGPHKFSMCVRKFCQCI	2.87327	8.6631	3743.4	-0.159375	1.91844	0.850449
GEIPYHQCKFDMECMLMKCVPGKVNVCSLGRCYCVNS	0.789607	7.77264	4187.02	0.0918919	0.892432	0.252677
SEFIFTKKLTSCDSSKDCRSFLCYSPKFPVCKRGICECI	2.70254	8.63796	4471.28	-0.0538462	1.67051	0.53467
RECHANSHCVGKITCVLPQKPECWNYACVCYDSNKYR	1.87577	8.31237	4319.95	-0.616216	2.07757	0.0501925
GIRRFECRQDSDCPSYFCEKLTVPKCFWSKCYCK	2.70253	8.63788	4127.82	-0.614706	2.43647	0.660239
NVILITDRVFCLTSKDCRCHKCFAREVPKCFLFMCVCYRI	3.77898	8.8226	4775.84	0.5525	1.246	0.102564
KNICIDDVHCQKYKCSPGLYPTCINGWCECK	0.786928	7.76815	3563.17	-0.396774	1.30871	0.899699
YPFQECKVDADCPTVCTLPGCPDICSFPDVPTCIDNNCFCT	-5.31269	3.61235	4476.11	0.129268	0.970488	0.107696
ECSTDADCEYILCLFPIIKRCIHNHCKCVPMGSIEPMSTIPNGVHKFHIINN	-0.943941	6.42646	5886.93	0.103846	0.977115	0.779673
GIRKKECRQDSDCPSYFCEKLTIAKCIHSTCLCK	2.78972	8.63857	3908.62	-0.458824	2.24471	0.653911
EESHYMKFSICKDDTDCPTLFCVLPNVPKCIGSKCHCKLMEHKHIQDKSCFICLLLQYMENESVIADI	-2.95974	5.69527	7868.25	-0.0588235	1.20265	0.987293
VRKPECRQNSDCPPYFCIKPTVPKCIKFKCLCK	5.69761	9.272	3873.75	-0.466667	1.83273	0.498336
KCVSDAECSGQYMCPTLTVIKCIKDECVCIHYDHDKQ	-2.12085	5.37567	4207.87	-0.243243	1.58757	0.055271
LFIPECNRTEDCPNVCLYPKVSLCIWWYCTCVTVK	-0.296569	6.13999	4140.94	0.374286	0.484286	0.0559524
DVKCDTDDDCRDYLCARPTVGKCIYDYCHCIVMITIDEKLSHQSGINKVVRENGHVSIDPTIKEIKLRENIL	-3.02548	5.45944	8253.48	-0.338889	2.16917	0.0371721
DSFRGCNKDTDCPEKFCSSPDVVRCIYIECYCI	-2.29322	4.52891	3810.33	-0.245455	2.17303	0.0525296
YREPFSSFTEGPTCKEDIDCPSISCVNPQVPKCIMFECHCKYIPTTLK	-1.20465	5.61549	5487.37	-0.3	1.46271	0.539667
QSIPDVLPCLFSNECPPDLCPTDLFAKCINLTCQCTAEYDLD	-6.29008	3.5736	4650.31	0.114286	0.979048	0.241387
KCNSDAECRERWIMCPLETVVKCVEDECICVH	-3.19785	4.75104	3742.36	-0.115625	2.01906	0.281805
YSFEECKEDADCHPVCSVPGCSNICTLPDVPTCIDNNCFCI	-6.22102	3.89557	4486.06	0.0804878	1.22366	0.0288791
FEECKEDADCHPVCSVPGCSNICTLPDVPTCIDNNCFCI	-6.22002	3.89557	4235.81	0.138462	1.19564	0.0290368
YGEKCGSSPDCEIYKCIPPAKPKCVLFGCMCIT	0.701443	7.75626	3585.32	0.133333	0.388788	0.40572
SLPDAPPCLFTPECPPDMCPTDLTLKCINLTCQCTSEYDID	-6.29008	3.5736	4505.17	-0.0853659	1.10927	0.106142
HCVIDAHCPRNMCGFHFPPRCVEGDCVC	-1.03275	6.25814	3146.68	0.114286	1.35679	0.644633
LYEPLYNFRRDPDCRRNIDCPSYLCVAPKVPRCIMFECHCKDIPSDH	-0.118776	6.8763	5630.53	-0.546809	2.4966	0.283248
YRECNSDGDCPNYNCRVKEVGMCYFTKCYCIRL	0.702534	7.75626	3947.54	-0.560606	2.44121	0.064216
SKSANCTSTVNCVHTPCMSPTLPLCVQDECVCV	-1.2092	5.31892	3471.04	0.360606	0.804848	0.0840697
SLPDAPPCLFTPECPPDMCPTDLTLKCINLSCQCTIEYDIDPDVVPS	-7.28896	3.50224	5111.89	0.0553191	0.894255	0.0919972
MRVLCGRDDTCPGFMCGAGSIIPKCVGRYCEC	0.70372	7.77373	3442.11	0.271875	1.12375	0.334588
ESIPEVLPCLFSNECPPDLCPIDLFPKCINLSCQCSAEFYNID	-6.2867	3.66332	4821.56	0.230233	0.730233	0.316234
LNCTTASQCVNNRCYLHGKPSCLNGQCACV	1.78586	8.34441	3201.69	-0.03	1.29433	0.206947
HQSIDDVIPCVLNTDCPRDMCPIHLFPKCINLLCRCSYWEDN	-3.11856	4.796	4921.71	-0.0928571	1.60262	0.0142144
GPIFCYNDDDCPHICSHPRVQKCRMFLCHCEEVEEKDEK	-4.02326	5.07375	4655.28	-0.830769	2.70128	0.0322197
ATKEKFHSCVNANDCPYDFCSPPKYAKCVYNSCYCEDQGRL	-0.211149	6.71128	4699.27	-0.734146	2.13024	0.703496
QFLPNYYEFYHCYNHSDCQGSMCPTGSKPKCVDQVCECILIRM	-1.1231	6.01436	5052.81	-0.34186	1.43372	0.480592
QCIYPACFKDHMCRQLKCSPGRTPKCVNYQCRCSPQALGSYHLLT	4.86024	8.99696	5150.07	-0.395556	1.67956	0.937452
FLKCDSDLDCPPKMCYSHLSFVPLCVDNHCDCIQWKFKNNIPKAFP	-0.125346	6.86767	5362.29	-0.163043	1.14739	0.475247
HNCTDISDCSSNHCSYEGVSLCMNGQCICIYE	-4.11909	4.30006	3529.9	-0.128125	1.56438	0.86487
LYVCRKVAECPENFCVPPLITKCVNYTCICDDPAYGEPIYDFVSVRTEKQKIKIKR	1.70528	8.27815	6501.68	-0.158929	1.51911	0.143878
EEDIGGHLECVEDEDCMEESCPIFSVHKCKNSGCECDEMFR	-10.0972	4.14136	4684.15	-0.665854	2.54512	0.428397
QKRRRSTECRNDSDCEKMVKCVLPRIARCIKYRCQCRNFLESFE	5.7091	9.33612	5400.31	-0.984091	4.04432	0.0780947
NNCTDTSDCSSNHCSYEGVSLCMNGQCICIYE	-4.20627	3.91299	3494.8	-0.3	1.86031	0.222208
GDYYSCHYDKQCDEDCPFPFKGYCVEQHCLCKRWLQ	-2.12185	5.37563	4408.95	-0.905556	2.17333	0.122653
ILECIFDIDCPTKKCAPPLVAKCDMYECYCRCPPNN	-1.30523	4.86346	4110.9	-0.025	1.13694	0.121975
LTVPCENPTTCPEDFCTPPMITRCINFICLCDGPEYAEPEYDGPEPEYDHKGDFLSVKPKIINENMMMRERHMMKEIEV	-9.09546	4.4475	9184.57	-0.548101	1.85152	0.0249009
DDGSFCFKDSDCPDEMCPSPLKEMCYFLQCKCGVDTIA	-5.29095	3.98119	4242.84	-0.207895	1.50605	0.127415
NITNCQSTFDCPRDMCSHIRDVICIFKKCKCAGGRYMPQVP	2.78721	8.66242	4680.53	-0.24878	1.9239	0.904923
EDIGGNCECIRDEDCFKQKRDEDCHKEYCMIFYVHKCENYKCVCAGMFN	-4.1303	4.91771	5864.65	-0.746939	2.56939	0.189834
WTCVEDSDCPANICQPPMQRMCFYGECACVRSKFCT	-1.30336	4.78265	4123.79	-0.122222	1.57611	0.743118
AHVECHNDSACEKTVKCMLPRIPRCIKYQCLCGYSDDPGNRWSTRPKRIQKGSTERKGFLY	5.87779	9.21743	7076.17	-0.87377	2.69672	0.745512
NIFFCSTDEDCTWNLCRQPWVQKCRLHMCSCEKN	-0.206286	6.71254	4139.76	-0.561765	2.35735	0.53954
FLRCDFDLDCPPKMCYSHLYFVPMCVDNHCDCTQWKDIIPTIP	-3.12224	4.72591	5125.01	0.00232558	1.10256	0.460445
QECKDDGDCPTNMCLPSLVSKCINFICECTHSMSTD	-4.20402	4.22839	3969.51	-0.25	1.78806	0.0475984
AYYECSNDSACQATTKCVLPRVPRCIKYKCLCGNSNGSGNRWSTRPNRIQKGSTESNYF	5.6994	9.24294	6628.44	-0.835593	2.62305	0.509793
HIECKNDFDCPKNMCLAPRVAWCVNNKCECVLTYGPKYSTMKEKLLQKEKI	2.79135	8.59595	5965.08	-0.515686	1.6802	0.789794
DDNKLLLSFIEEGFLCFKDSDCPYNMCPSPLKEMCYFIKCVCGVYGPIRERRLYQSHNPMIQ	-1.20443	5.65596	7300.54	-0.230645	1.48629	0.764051
LIECYTYFDCPKDMCIFPSIVVCVRNQCDCVEMF	-3.29333	4.10505	4028.79	0.620588	0.632941	0.271654
TYDAYDECQTEFDCPKNIDCVYPKSMKCIDKKCICVGARMIIPRVL	-0.296092	6.24731	5321.29	-0.156522	1.61717	0.013095
MVSTNAYIHRCIHQDDCPKYMCEISVLPECINGFCTCV	-2.1201	5.31269	4338.08	0.244737	0.975263	0.127193
IENNDCEKGMCKFPFIVRCLMDQCKCVRIHNLI	0.802616	7.82755	3914.73	0.0606061	1.57788	0.105926
NIMNCQSTFDCPRDMCSHIRDVICIFKKCKCAGGRYMPQVP	2.78721	8.66242	4710.61	-0.185366	1.8039	0.863634
YWKCTLDNDCPKNMCLLPQIAQCVKFNCECKFYFYVQ	0.698755	7.75177	4501.32	-0.118919	0.948919	0.73231
HSFLPCQTKDDCVFDDCKFPKNPVCYLEACHC	-2.12166	5.3007	3707.26	-0.28125	1.55	0.0532389
CMLVTCEDHFDCRQNVQQVGCSFREIPQCINSICKCMKG	-0.216187	6.70523	4468.25	-0.074359	1.74795	0.952702
EAVHRCIEYTDCPEDMCHLPLVVVCHDHICKCLRLIKIRSY	-0.94284	6.42847	4855.78	0.153659	1.46293	0.0203744
IKLIKCTVSDDCPMNFRCPPNTFVRCISDLCTCRICKKIAPFLGQLQDNIPTIDPFGVDLVVDLGSWSVLLSRSQVRLPLVPISVGKSIQRFARFNRVISYDHINDLLMNKNE	3.78379	8.78358	12796.1	0.142478	1.39345	0.120611
KDITCTVAGDCPNFFVCPPNNFVRCIRNLCKCRFVYLNTFLKVYTDKDFIF	2.69915	8.63785	6004.09	0.217647	1.26647	0.417663
KDITCTVAGDCPNFFVCPPNNFVRCIRNLCKCRSLSYKQP	3.69891	8.92063	4552.36	-0.16	1.7965	0.589712
KDITCTVAGDCPNFFVCPPNNFVRCIRNLCKCR	2.70091	8.68803	3748.45	0.0515152	1.7803	0.468627
CKRIPCKDNNDCNNNWQLLACRFEREVPRCINSICKCMPM	2.69562	8.59023	4760.63	-0.5875	2.66875	0.550891
IRIHCKDDFDCIENRLQVGCRLQREKPRCVNLVCRCLRR	4.79478	9.21418	4758.66	-0.548718	3.61795	0.147342
LPISCKDHFECRRKINILRCIYRQEKPMCINSICTCVKLL	4.78958	9.12534	4782.86	0.0375	1.774	0.423137
EVKPCTYNIDCPLSMCPSPEIPKCVNSICECK	-1.29375	4.87039	3545.21	-0.078125	1.06875	0.0445989
FSGCMNDSDCPDLFCLPPLDMKCHELVCKCR	-2.20684	4.75044	3521.17	0.016129	1.38097	0.220881
RPVSCKDHYDCRRKVKIVGCIFPQEKPMCINSMCTCIREIVP	3.7907	8.90287	4897.92	-0.17381	1.95786	0.359778
CFHDADCVHKRCQLPQIPKCVGKKCRCRGQYQANPMG	4.87226	9.12575	4219.99	-0.737838	2.30514	0.307956
VYWCFDNSDCPQHLCHELIIPRCKIGVCVCLP	-1.12191	5.99506	3705.42	0.4625	0.443437	0.308662
QEVLQYELFDCNEDRDCDNVICVAGGIPKCITPFCFCF	-5.2884	3.89767	4348.98	0.231579	1.12737	0.0342997
QEVLVIHECNRDRDCHISCVPPELPKCIAHMCFCFNS	-2.02813	5.77686	4288.01	0.0297297	1.57676	0.079615
MKNGCKHTGHCPRKMCGAKTTKCRNNKCQCV	7.86903	9.69831	3467.18	-1.06129	2.72839	0.456139
KSVTDEIVVCSSTKDCRDKNYPCPSPLVLDCVANVCTCIHLQPTFTNEIHAPKPSVTN	-1.11986	6.02917	6333.26	-0.144828	1.50897	0.04632
VVICDLEKDCRQYLCIPPEFPRCIGGICRCK	0.705531	7.76955	3571.33	0.196774	1.36968	0.0367559
IHIGCDKDRDCPKQMCHLNQTPKCLKNICKCV	2.8734	8.651	3686.44	-0.53125	2.04594	0.272303
EDFPFHKCEKDEDCLEICADDQMAMCILNVCFCY	-7.19828	3.97	4022.61	-0.0235294	1.47824	0.00634701
SSRCKSDADCDCPPPFKPKCRFRSCTCSNLKVWKGPELSFI	3.70184	8.90279	4638.41	-0.580488	2.30707	0.0256314
YEDFEKEIFDCKKDGDCDHMCVTPGIPKCTGYVCFCFENL	-5.20128	4.35226	4644.29	-0.3225	1.55375	0.727874
AILECREDSHCVTKIKCVLPRKPECRNNACTCYKDCILLINDHMA	0.871912	7.74644	5165.12	-0.162222	1.93978	0.00127715
AILECREDSHCVTKIKCVLPRKPECRNNACTCYKGGFSFHH	2.96675	8.65139	4695.47	-0.458537	2.15976	0.28377
QKRLHGCKEDRDCDNICSVHAVTKCIGNMCRCLANVK	2.87719	8.66302	4162.89	-0.435135	2.52297	0.536627
DDYLKYIYRCQNDGDCDQICATHGISKCVATMCFCNLNL	-2.21153	4.66486	4452.08	-0.128205	1.5941	0.417809
LAGCITDADCVIKKCSSSCRIKCIDFRCLCPTGF	1.69114	8.26658	3671.42	0.561765	1.00029	0.493319
QKDLIILWFTEVFTCQRDEDCKVACATYGGDPWCFRNVCFCKHYNEGGTLHAELH	-3.02707	5.38104	6413.27	-0.26	1.49855	0.167762
VIFECSEDSHCVTKIKCVLPRKPECRNTQCTCYRGYKGSFTLHH	2.96575	8.63966	5118.93	-0.493182	2.17523	0.803859
RGVTVENIRCKSDRDCVGRMTCNPDRDVKCIGKQCECIAIHSTNFYK	2.79293	8.64996	5364.19	-0.591489	2.90617	0.695868
ARFECREDSHCVTRIKCVLPRKPECRNYACGCYDSNKYR	3.79249	8.88582	4671.36	-0.976923	3.55462	0.0201184
RITHDPSTRSTVSGGFGKCVRDADCVDEVCSPGCNKRCVGFECQCPL	-0.213965	6.71145	5034.7	-0.317021	2.25447	0.958997
MKYGCKHTGHCPRKMCGAKTTKCRNNKCQCVQL	7.86803	9.63823	3757.54	-0.921212	2.38485	0.369688
RITHETLRNMPLPGSKPIPILRGECISDAECKHPECDNCRGICLNSRCVCMMRLGWTYTTPQN	1.87557	8.27053	7161.37	-0.449206	2.1073	0.10403
SQATRMTEKLDSSCNTAEDCTIQNRHCPPGLIVICASHHCTCIH	-0.943764	6.4218	4826.48	-0.270455	1.95318	0.0185282
IPCATSDDCLKNMCRPPLTPRCIEHNCKCK	1.7899	8.33558	3391.05	-0.49	2.19	0.362785
YMIPCATSDDCLKNMCRPPLTPRCIEHNCKCK	1.78891	8.32697	3685.42	-0.440625	1.98406	0.0190676
WRPDCKENNDCPTFYCATWINTCIKFKCYCIRPWG	1.70073	8.31678	4276.97	-0.525714	1.72886	0.0112768
TAIHECRAHSHCVARINCVLPRKPQCRNYACGCYDSNKYR	4.9611	9.12536	4638.34	-0.6825	2.794	0.0506778
ARYECREDSHCVTKVKCGLPRTPKCRNYICFCHNPNKYI	4.87475	9.07914	4647.42	-0.807692	2.72231	0.0646169
LKPTDIRMESQGRRMAHGVVPPSCKSDGDCKNYKCPPSLPFPYCDHDKCGCGN	1.87644	8.30442	5840.69	-0.881132	2.31698	0.0392244
EDRCRSILDCPQDKCFPLLTLVCTNFICDCLHV	-2.20586	4.75041	3814.5	0.333333	1.40303	0.034584
TTKCKNNFECRFLICMNPLVPKCKVPYCRCM	4.69849	9.12576	3684.56	-0.0387097	1.3829	0.376598
ASRNCELDSDCPNYLCYPPKVGKCYFHNCYCN	-0.213082	6.70158	3721.2	-0.64375	1.92375	0.667926
KSYGPCTTLQDCETHNWFEVCSCIDFECKCWSLL	-3.20445	4.50177	3990.54	-0.129412	1.20294	0.393631
FHCHMDYDCYDQITCIIGDVTCLEGSCDCPQDV	-7.11742	3.80099	3743.17	0.00909091	1.38485	0.451375
EEWNSHSWNSEFYLKKSCSSDFDCPRTMCIKLSLARCFNDFCHCY	-1.11818	6.03944	5433.11	-0.557778	2.24156	0.18943
WRVDHDPYKSCHSDEDCTKIHYYCPPSKVPYCQVDRCGCGN	-1.03638	6.26762	4806.35	-1.03902	2.62098	0.0587016
ETYVLCFYDSDCPQDKCKNPDDVPRCIFPVCHCIKS	-2.20872	4.82397	4182.8	-0.352778	1.8875	0.0800802
SATTRCVRNSDCRHHICMYPLVPRCKYPLCRCV	4.87312	9.18163	3882.65	-0.206061	2.37364	0.216488
FGRFLLYNNCKQDVDCPNICSPHEHSKCILYVCYCVDK	-0.124787	6.86846	4469.18	-0.160526	1.45368	0.902034
HKRCRVDFDCRMRMCVYPTVSVCIDRLCRCRRPPNM	5.78915	9.48437	4417.35	-0.447222	3.46583	0.0142025
DTDPFAFCIKDSNCGQDLCTSPNEVPECRLLKCQCIKS	-2.29221	4.52893	4222.82	-0.347368	1.96684	0.567403
DKFVFDKNGADRCRSILDCPQDKCFPLLTLVCVNFACDCLHV	-1.20842	5.45377	4763.58	0.228571	1.39095	0.132106
ERTCKEDFDCRMRYCVYPTIPLCDVKHCRCRRPPNL	2.7928	8.66204	4418.2	-0.811111	3.36861	0.0595449
QTEPPGPLIPCEFDYDCPLIDCIRTSDSRCINGNCHCRE	-4.20024	4.37971	4411.95	-0.548718	2.39923	0.0501868
GNHTYWCVTTDDCATNICRSGLTEECWVFRCICKYETK	-1.20547	5.55695	4451.03	-0.365789	1.94737	0.149783
WRVDHDPYKSCHSDEDCVKIHFYCPPPKVPYCRVDRCDCFN	-1.03427	6.271	4974.63	-0.860976	2.71537	0.0428401
HSFLPCVTKDDCAYDECISPRKPTCYLETCHCL	-2.11998	5.34619	3792.36	-0.230303	1.62788	0.00640571
FPWKLYPCVTDKDCPRKNRHVVKCRKGYCVGVQII	5.80289	9.55943	4151	-0.382857	1.782	0.00928969
YILCKTVNDCPPNTRNLRYRCIDGKCKSHRVLYEWDESHTQDITITPCIEE	-1.10536	6.06278	6071.89	-0.752941	2.67039	0.0279575
YVVCRTVDDCPPDTRDLRYRCLNGKCKSYRLSYG	2.71894	8.84518	4016.6	-0.764706	3.11294	0.0089154
IEDDIFCITDNDCPPNTLVQRYRCINGKCNLSFVSYG	-2.27523	4.35999	4227.77	-0.213514	1.91459	0.57159
STIMYYDVPCEKDKDCPAPPRFNIRCRKGYCVRI	2.72064	8.8454	4038.75	-0.617647	2.53794	0.0402354
VLIDCKTVKDCPTSYTKIYRCEDNKCRFSFVIGL	1.72066	8.47583	3959.67	-0.0323529	1.69706	0.229096
VLIDCKTVKDCPPSYTKIYRCIDNKCRLVL	2.71785	8.8458	3501.24	0.03	1.56333	0.14781
FNSKIVFTDCKTDKDCQNHRGFNFRCRKGNCVAKIR	5.806	9.69554	4250.91	-0.869444	3.34	0.0176943
GGKYENIPCESREQCPNTATRRYACLNKLCYCYDNNYPNGWNPFEP	-0.284064	6.27441	5393.96	-1.18696	2.61239	0.550937
TGMPCKTDKECPNTSTHKYKCINDDCFCFYIYWPLGNSLV	-0.203049	6.71154	4637.33	-0.4325	1.36525	0.0888033
DIVCITDNDCPPNTLVQGYRCIDGKCESVFLSYR	-2.27523	4.35999	3838.35	-0.117647	1.80647	0.673684
LVQNECVTDGDCRRLYPHLIPRYPMCNEGTCVCIFE	-2.19358	4.89824	4188.85	-0.113889	1.7	0.137601
SFITFRDSRCKTDKDCPNIPMATGRCRKGHCVLV	3.808	9.24926	3856.53	-0.414706	2.59824	0.303725
EEIIIIKCQTAKDCPDIYNLFPLVYKCIDNICVDVRLEPPYDMSISPKSVHK	-2.18629	5.04083	6012.08	-8.54e-18	1.16981	0.00380026
YVNCETDADCPPSTRVKRFKCVKGECRWTRMSYA	2.72333	8.8668	4001.6	-0.797059	2.92235	0.0132351
GGKKIYCENAASCPRLMYPLVYKCLDNKCVKFMMKSRFV	5.71542	9.46377	4536.55	-0.0641026	1.12154	0.223622
YIVCITDNDCPENTEVRQYECIEGRCRLSRVLNP	-2.26806	4.6568	4002.52	-0.520588	2.81941	0.026058
VLIDCKHVRDCPKGIWRSCRYKCIDNKCVFTYWPH	3.88228	8.99611	4284.08	-0.394286	1.95857	0.639605
DDVKIKCVSAIDCMDLFNLLPIVYKCINNICVYEQSSQRLI	-1.27721	4.78	4721.6	0.431707	0.905366	0.126443
GSKPFLTRPYPCNTGSDCPQNMCPPGYKPGCEDGYCNHCYKRW	1.78591	8.30257	4872.51	-1.09767	2.05581	0.154019
VDYIKIFCIDVADCPKDLYPLLYKCIYNKCIVFTRIPFPFDWI	-0.281901	6.11291	5206.27	0.562791	0.185814	0.0369423
IRTYRECENASDCYSIYWRAPYGTMRCVKGHCKQIKDVKVMKFLYCV	4.7956	9.12211	5657.68	-0.376596	1.91957	0.0579267
ECENASDCYSIYWRAPYGTMRCVKGHCKQIKDVKVMKFLYCV	2.79662	8.68937	4967.87	-0.266667	1.49024	0.223479
IDPPHHITNHEIPCKYNHDCPTILDYISICPYHYCEFWRTY	-2.84065	5.84196	5049.7	-0.57561	1.55537	0.0736066
LHCNNDNECPPSTWKPFVRCKMNRCIYSRVQPPWAC	2.79868	8.77975	4294.99	-0.741667	2.265	0.0407413
NRVVVTIGGNCIRDKDCLKFYGANIRCRKGKCVAI	5.7177	9.69547	3884.66	0.00857143	1.87743	0.154427
LIDCKTVDDCPSSWTKIYKCIDNKCRYSVVKGLII	1.71798	8.46315	4021.78	0.0542857	1.28171	0.165401
YFADILCKVHEDCPQKSTHKYYCIDDECFLYYWEAP	-4.10023	4.6346	4438	-0.505556	1.465	0.0125212
FFVDIMCKVHEDCPQKSTHKYYCVDDKCFLYYWEGKP	-1.10404	6.03035	4567.26	-0.551351	1.51351	0.317801
IHCNDVNDCPPDISNPFVRCESNRCIYSRLEPPFGC	-2.19427	4.82842	4111.63	-0.458333	2.36222	0.201666
RVKCIKDYGCQNKSCQFPLKPYIRTGRVTCKNDSGCELKLCKLPLFPKCVKPYFLFFSTKEGFCACN	8.66584	9.28314	7708.23	-0.246269	1.40597	0.988785
YVVCITNNDCPPRTRLILYKCRNRKCVSYSII	4.71658	9.43634	3805.55	-0.053125	2.03187	0.112874
RVSYNSFIALPVCQTAADCPEGTRGRTYKCINNKCRYPKLLKPIQ	5.7174	9.55863	5118	-0.475556	2.00733	0.0167414
LPVCQTAADCPEGTRGRTYKCINNKCRYPKLLKPIQ	4.7184	9.38531	4079.83	-0.661111	2.09944	0.0145848
GHLSIHCVSVDDCPKVEKPITMKCINNYCKYFVDHKL	0.9812	7.87817	4279.05	-0.162162	1.22919	0.0901259
EQHFVTLYKKKEKCALDVDCLELFPNSYKYLMKCVGGDCISLSKGFSHDEIKE	-1.09761	6.07815	6132.1	-0.381132	1.48868	0.911157
QIIFSECKTDKDCPKYQRANIRCRKGQCVRI	4.72051	9.43634	3701.36	-0.841935	3.25581	0.00589764
TSTFELDSPFPHYKSRSRFLATTIKKGSKCNPIGKNICNGILANKGTELLQCCKKKCVDVIGDMNHCGQCGKKCKQGERCCGGVCTNILYNVNNCGKCNKKCKRGIPCRIGFCGYA	14.7688	9.31314	12664.9	-0.412069	1.69647	0.394861
TSSLNDEPNSSLQGTSYFLNRKQNRISMSCDKYPKICYIKGSAGPDCCKNKCVNFTIDMFNCGRCGKKCSFPRICCEGKCVNPRSNKKHCGKCGNKCDSKGSCVYGMCSYA	11.6811	9.09836	12246.2	-0.637838	2.16505	0.0586926
LKVIIPSSTCDSDYDCLRYEEALNVITCCNNGLCVMFWRDMVRSRFDGEVEAAIGVGESRDGTLGGGVEILTHIWEILMKSTTRVKALVKSTKK	-1.18388	5.79254	10445.1	0.0148936	1.49436	0.643871
AHIKCETDDDCPKSLNNLLAIKCIDHVCKFVSNLSQFEDLF	-3.09793	4.91133	4668.35	-0.0560976	1.50854	0.336579
SSSENEEPNSSLQGTSHFLNRKQYRISLTCDKYPKICHTKGSAGPDCCNNKCVNFTIDMFNCGRCGKKCSFPKICCEGKCVNPRSNKKHCGKCGNKCESRGSCVYGMCSYA	9.86359	8.95835	12243	-0.744144	2.31333	0.103643
TSSENEEPNSSLQGTSHFLNRKQYRISLTCDKYPKICHTKGSAGPDCCNNKCVNFTIDMFNCGRCGKKCSFPKICCEGKCVNPRSNKKHCGKCGNKCESRGSCVYGMCSYA	9.86359	8.95835	12257	-0.743243	2.30586	0.107987
HPCLSDHDCYIQYPKTPFGHMECYKGSCRPI	-0.0179328	6.98352	3627.16	-0.703226	1.69323	0.178517
TSSKNEEPNSLQGTSHFLSRKQNRISVSCNKYPKICNIKGSPGPNCCNNNCVNFSIDMFNCGRCGKKCSFPKICCEGKCVNPRSNEKHCGKCGNKCDNRGSCVYGMCRYA	11.7745	9.13352	12132.9	-0.777273	2.43864	0.0555806
EKECISDAVCYEKYPGPFNFIMNCVDGYCKAFPKLV	-1.27582	4.93872	4122.81	-0.0305556	0.788333	0.0115032
NDDDKNHHEIEDEDEEEQDFYVLDTHHGSRSRFLASIIKKGRQCNRETNNICNGVRANKGNDLLFCCKKHCRNVLSDKNNCNVCGNKCKQGERCCNGVCTNVLSNVRHCGKCKKECSNGDPCGNGFCGYA	1.14717	7.56775	14591.2	-1.00846	3.07962	0.054462
QVKCKTVKDCPIRRNRKYYCLFGICKYDVM	5.71472	9.50774	3672.46	-0.45	2.22833	0.117665
EFTLFILSFFVTRYYPCNTDSDCPQNMCTPDMEPRCWTGYCSSCYIRWGK	-1.29535	4.86351	5977.82	-0.31	1.6272	0.63614
NTEADCPQRFDNIVECLFGICHFYIK	-2.17657	4.75116	3076.51	-0.0346154	1.47962	0.366816
DIPCKTKADCTQHRKYFAECIFGFCRHFKHLEHPF	2.07204	8.49475	4254.94	-0.594286	2.092	0.0589378
SECISDTDCNVLYPMYINRRLRCIQGICHTTTARRR	2.81067	8.94316	4259.93	-0.463889	3.07861	0.0156244
DFPCKTKADCLQHIYYIVECIFGFCQYFKPLKHSV	0.892905	7.86811	4185.95	0.114286	0.593429	0.779612
KEECTYAADCYKRYPRWSLLPNYCIEGSCYSDFLNSGKKYLSP	0.721161	7.82975	5063.72	-0.744186	1.93186	0.439842
DFPCKTKDDCAQQIDYIAECIIGFCRYFTPFEHPF	-3.18623	4.51811	4162.74	-0.202857	1.46914	0.10096
TIPCKTKADCPQHIYYIIECLDGFCNYWRD	-1.19116	5.42818	3610.15	-0.33	1.45367	0.0603184
DFPCKTKVDCPQHKKYIAECIFGFCRHFKPLEHPF	1.98388	8.48022	4210.96	-0.488571	1.554	0.0271004
TIPCKTKVDCPQQIYYVVECLDGFCDYWRD	-2.27721	4.36	3602.13	-0.28	1.53667	0.166627
YDSIPYVNSGPCVTDKDCPKVSQYNIRCRKGQCARIRV	3.71783	9.13193	4333.99	-0.65	2.63974	0.00654781
KPGSPNLRNHSCLRDKDCPQLKFHNIRCRNGFCVDIR	4.89516	9.57881	4339.02	-0.962162	3.35216	0.0256712
TTSCITDDDCPKAVSFLVFKCIDNICVRVEIL	-2.27422	4.35996	3562.19	0.6625	0.946562	0.276211
ESKLEQTCSEDFECYIKNPHVPFGHLRCFEGFCQQLNGPA	-3.09299	5.01565	4603.15	-0.5925	1.80325	0.0388688
KEDGSVECIANIDCPQIFMLPFVMRCINFRCQIVNSEDT	-3.26873	4.29622	4480.2	0.14359	1.51795	0.188649
WSWGLTTECVTELDCYKKYRLPAEKKMKCIRGSCYRVRE	3.72483	9.0748	4731.56	-0.738462	2.42923	0.00787702
LNLADYSCIKDKDCPKVKSFNIRCRKGFCVNIL	3.71785	9.13265	3805.55	-0.112121	1.79333	0.592247
EKECACVADCIYKYPTLRDLVVKCIEGYCKAILYRKGWVGGVQD	0.713379	7.78632	5000.9	0.0181818	1.0275	0.0433803
EKECACVADCIYKYPTLRDLVVKCIEGYCKAILYRKVSLTTLKTC	2.70136	8.5952	5149.2	0.2	1.01511	0.0158049
IHFHVSRPCMTDNDCAPEKYYNIRCRKGFCVQIRKY	3.89386	9.1323	4393.12	-0.691667	2.66917	0.111227
AFVANTETCITDKDCPNGRNYIGRCRKGHCQQRLVR	3.80968	9.24871	4124.7	-0.836111	3.22444	0.386915
FYSHVPNPCITDKDCIRRAGMNIRCRKGYCVNLILR	4.80587	9.49834	4227.03	-0.238889	2.28417	0.188767
LHDCEYDDDCPKSTSKRTYRCINKKCRSYFTRVEK	2.80974	8.80738	4289.84	-1.42571	4.10229	0.0998522
VYDSKYFNIAPPCVIDKDCPQFKNNNVRCRKGFCVNLSVNWIK	3.71685	9.10256	5037.87	-0.355814	1.79512	0.640985
KYFQIASPCVNDKDCPRFKNNNVRCRKGFCVNLCN	4.70781	9.2636	4095.76	-0.648571	2.66486	0.178615
NNSPPCVTDKDCPRPQFRKSNVRCRNGYCVNLGN	3.7197	9.24909	3853.34	-1.14412	3.41441	0.0357824
VTSPWVLKQHCVTDKDCPQMGKIKIRCRNGECVQGF	2.80871	8.89092	4105.84	-0.430556	1.83972	0.0558169
ITPWLKKTCVTDKDCPKVAKINIRCRRGQCVQVF	5.71771	9.69674	3948.78	-0.247059	1.95176	0.172539
AYLPLSRSCITDKDCSRVKNYNARCRKGYCQYLQY	4.71471	9.30267	4180.81	-0.817143	2.80571	0.0893124
VSLSFFIAARVCKSDKDCKDIIIYRYILKCRNGECVKIKI	4.71865	9.3031	4653.64	0.2775	1.40275	0.119977
TYLPTTRICITDKDCPSVKNYIGRCRKGYCQASKLR	5.71571	9.55861	4152.88	-0.633333	2.54306	0.0180836
YIPGIVNKPCKTDKDCPKKPPHNIRCRKGQCVEIL	4.80571	9.34197	3992.79	-0.777143	2.11143	0.0887632
FQYHVVSPCLSDKDCFRTSANNIRCRKGFCVPI	2.80689	8.91602	3805.42	-0.133333	2	0.015585
KKKRYIECETHEDCSQVFMPPFVMRCVIHECKIFNGEHLRY	0.991169	7.8848	5045.92	-0.543902	2.21073	0.825137
VRIPCVTVADCPPTILPVFYECIDKFCMLHIE	-2.18647	4.75111	3666.45	0.84375	0.0171875	0.0735996
ENSCVTNDDCPEAVFFVTFRCIKNICVRIR	-0.272669	6.18733	3493.05	0.16	2.10133	0.306821
FPLMPIPCRTDKDCPKKMGTVGKCRKGYCAQM	4.71673	9.38592	3604.42	-0.515625	1.63094	0.0530138
EDIGHIKYCGIVDDCYKSKKPLFKIWKCVENVCVLWYK	1.80667	8.42943	4565.45	-0.136842	0.879737	0.226921
YSVYGCNDDTDCPPSCTTRGCPDSCAYPHVLRCIGKNCAENKNGIAEL	-2.21694	4.89158	5155.74	-0.489583	1.93917	0.0823549
KRTNIPCFSDDDCPKTSPPLVLKCDDYFCRYFREKNLI	0.722888	7.85271	4542.24	-0.686842	2.63605	0.59927
DRIPCATDADCPPKILPIIHKCINNFCKLKLYN	1.80603	8.49069	3771.53	-0.0727273	1.19667	0.0221215
ISIYVRCASTNECYTTFKFAPRGSMRCLEGYCKHLKNFKVTQFLYCV	4.79537	9.17067	5521.51	-0.00851064	1.32362	0.143585
KYFQIASPCVNDKDCPQFKNNNVRCRRGFCVNSGGATQKCLGCPSLK	5.69691	9.30293	5197.01	-0.576596	2.16596	0.223949
SNTLLAFRECVYDKDCPVMPRCNMRCRKGVCIPVRRKEYFKMNVSLL	5.71241	9.44669	5584.74	-0.231915	2.24234	0.0546155
YFNDPRPCVSDKDCPRPKFQKSNVRCRKGYCVNLDG	3.71895	9.13196	4206.8	-1.13889	3.31389	0.0846736
SIPCETTADCPVAVPPEYYKCMYKVCVLIR	-0.277766	6.15184	3393.07	0.326667	0.510333	0.0132682
VSKLAQSCSEDFECYIKNPHAPFGQLRCFEGYCQRLDKPT	-0.18667	6.73331	4610.23	-0.615	2.05125	0.0135319
IYFPVSRPCITDKDCPNMKHYKAKCRKGFCISSRVR	6.80288	9.76363	4249.07	-0.580556	2.50556	0.00891704
AATPCTSDKDCRLERYNVWCINGYCKYKFTPID	0.720656	7.85249	3875.42	-0.593939	2.13576	0.0649771
KEDDIECVTDADCYEKLPALQRAVMKCIQGFCKIHI	-2.18442	4.99956	4127.83	-0.130556	1.56833	0.0288891
TYIPITRTCITDKDCPSWKNYTGRCRKGFCILNRDR	4.71881	9.43559	4295.98	-0.802778	3.06417	0.133649
ITPWLKKNCVTDKDCPKVAKINIRCRRGQCVQVF	5.71771	9.69674	3961.78	-0.329412	2.07147	0.235095
FGMTLRPCLTDKDCPRMPPHNIKCRKGHCVPIGKPFK	5.89206	9.69683	4223.14	-0.591892	1.85757	0.0360429
ISIYVRCASTNECYTTFKFAPLGSMRCVEGYCKHLKDFKVTQFLYCV	2.7965	8.70261	5465.44	0.176596	0.964468	0.503015
KKKCASESDCYTMFPVPHFIVMTCIEKKCHITGIYY	1.8936	8.45395	4216.05	-9.25e-18	0.779167	0.0642107
IYYPISRPCKTDKDCPNRKNYKGKCRKGFCMSSRLR	8.7137	9.96993	4314.11	-1.25	3.46444	0.0123421
APKPCVTVKDCPKTVFPIGYKCIKNLCILVI	3.71562	9.13336	3405.28	0.677419	-0.262581	0.00160917
VKNINRECTQTSDCYKKYPFIPWGKVRCVKGRCRLDM	5.71852	9.55862	4437.26	-0.759459	2.6427	0.0116999
VVVCEIDADCPQICMPPYEVRCVNHRCGWVNTDDSLFLTQEFTRSKQYIIS	-3.19234	4.64732	5923.78	-0.0627451	1.66314	0.673857
AIPCGTRDDCPKTTTYMCFNNICVLLR	0.720721	7.8776	3049.6	0.1	1.46704	0.0614713
RGIRPGRECVSDYDCYIKYTILWKYNNVCTKGVCYTLLDAVHP	1.80582	8.45213	5027.83	-0.246512	1.54349	0.067867
EPDDNQKNCVSDSDCYKKFHLPRHFIMKCIKNRCTFV	1.89613	8.47871	4461.15	-0.856757	2.81946	0.890316
SNLHIHVPCLTDKDCPWAKNYVLKCRKGYCVF	2.89108	8.84688	3752.45	-0.1875	1.20094	0.414418
AFVPNSGPCTTDKDCKQVKGYIARCRKGYCMQSVKRTWSSYSR	6.71471	9.69646	4907.65	-0.811628	2.59209	0.079377
ITPWLKKICVTDKDCPKVAKINIRCRRGQCVQVF	5.71771	9.69674	3960.84	-0.0941176	1.73147	0.137738
QMINFRGCKRDKDCPQFRGVNIRCRSGFCTPIDS	3.72181	9.30308	3949.57	-0.691176	3.16353	0.00439255
KQTNIPCKSAEDCPKPIYPRYVLCSYGFCRIFFP	2.71841	8.84583	3985.71	-0.223529	1.27824	0.144135
QIIFRQCKTDKDCPKLGRANIRCREGYCVRI	4.7215	9.49828	3684.37	-0.612903	3.08065	0.0175581
YIKCKTVVDCPYLISRTLVIMCINKQCVAHYIH	2.88996	8.84687	3869.74	0.6	0.329394	0.00396634
EHIQCVIDDDCPKSLNKLLIIKCINHVCQYVGNLPDFASQIPKSTKMPYKGE	-0.103042	6.88833	5888.89	-0.257692	1.25481	0.171001
NFEDISIECMFSIDCPQIKSNIFRFKCIEDRCKIEFIYQRKKYEI	-0.269111	6.35605	5585.53	-0.337778	2.24244	0.00568097
EHNECETDADCPKHTTIFFVMKCIDHICRCMKTSI	-2.01909	5.78578	4100.76	-0.274286	1.99629	0.169259
SYYGCETDADCPRSMNKDFYLKCVDKKCEWTAKI	-0.2774	6.23699	4012.57	-0.808824	2.32206	0.049685
YKCNIDVDCPITPSPKFKWKCINKRCLYIRFDEIWTSDPRE	1.72358	8.46301	5022.85	-0.7	2.37098	0.00335448
LTKCETDANCPEISIFSPFFYKCINNGCVLIML	-1.27576	4.67901	3728.43	0.575758	0.236364	0.282575
AYIIECQTDDDCPKSQLEMFAWKCVKNGCHLFGMYEDDDDP	-7.18105	4.02853	4775.32	-0.62439	1.93707	0.164944
DECQIDADCPKSGNLFYIYKCINHKCELVAAHLRFY	-1.10217	6.02331	4221.85	-0.2	1.45278	0.549217
FVKCETTDDCPKSDYIRQYECVNNWCRLARLHEFQPKKSTLTS	0.813442	7.86417	5154.84	-0.872093	2.79884	0.0640056
ESIECRTVADCPKLISSKFVIKCIEKRCVAQFFD	0.727155	7.8655	3907.63	0.179412	1.58294	0.0533614
YIACQSEIDCPPNYSFLFAIRCIKQKCVTVGRYL	1.71941	8.48915	3943.67	0.267647	0.904118	0.255991
DIYEECETDDYCPKYRDLLYVFKCIDKRCELVEAHA	-5.17969	4.45106	4389.95	-0.588889	2.43139	0.021778
AQNDWMKCKTDDECPKVSNPPLYFKCIDRGCRIVIKMRF	2.72177	8.84559	4650.51	-0.589744	2.32077	0.209044
YLKFECKTDDDCQKSLLKTYVWKCVKNECYFFAKK	2.71849	8.75794	4317.08	-0.648571	1.83657	0.848487
LYIIECKTDADCPISKLNMYNWRCIKSSCHLYKVIQFMV	1.80572	8.46461	4671.61	0.176923	0.863077	0.216145
MEVGRRANVECESDKDCQEHWSEFFIIQCIDNICVPSERPL	-5.17313	4.43769	4827.43	-0.470732	2.47122	0.0809756
QNLMKCNTDDECPKFDDKFPLSFKCINDGCRMVINDKYKHKTVQKLL	1.80821	8.44064	5566.5	-0.780851	2.38574	0.452796
EVDWIYHLCDTDTDCPEHWSKFFIYKCVNHVCDSISKVTTDSKEYKNFP	-4.01082	5.00356	5888.57	-0.612245	1.9898	0.190423
EDYYYIECQRDFDCPQLNSEIFAFKCIEKLCKLEFIYQQAPFLLGQV	-4.26909	4.3337	5703.56	-0.12766	1.2166	0.337265
GRLRYGCETDADCPRYTHNNFSLKCINKKCEWSAKLH	2.89668	8.84649	4358.96	-0.989189	2.8073	0.0295293
NPYIINILCKTDKDCPKVQGANIRCRSGKCVQV	3.71772	9.16642	3678.36	-0.293939	1.8503	0.143466
AENIECEVDADCPKSQVNSFVIKCIKNLCLYTKIHILYDTISKSESTLPQKKKKSNSTLTYFKEE	0.81491	7.82617	7459.58	-0.509231	1.86077	0.273349
AELGGPCRSDEECPQLSLRFFAIKCRENVCIYVDLDPYKPRAEKNQFLH	-1.17995	5.68243	5700.52	-0.532653	2.21939	0.0696558
VHDVAHTDIPCEPDADCPKSLHEYFEMKCIDKKCEWSRKTSLIP	-3.00714	5.39898	5116.85	-0.675	2.13386	0.0467915
AITNIRCVSDDDCPKVIKPLVMKCIGNYCYFFMIYEGP	-0.279334	6.13341	4361.21	0.313158	0.607895	0.0215865
AYIECEVDDDCPKPMKNSHPDTYYKCVKHRCQWAWK	-0.103052	6.88834	4388.99	-1.16667	2.50861	0.0118824
SHFGCETDADCPRSTDKNFFLRCINKKCEWAAKRH	1.8998	8.50584	4115.65	-0.965714	3.10514	0.847585
FQPCVTTADCMKTLKTDENIWYECINDFCIPFPIPKGRK	-0.275524	6.21352	4567.35	-0.302564	1.43615	0.0672033
AHFPCVTDDDCPKPVNKLRVIKCIDHICQYARNLPDFASEISESTKMPCKGE	-1.10703	6.05345	5864.76	-0.448077	1.97154	0.0139554
QRTCKTDADCPKIPSLYPTIYKCLDGICRFSEAKLLIL	1.72066	8.47583	4318.15	-0.00526316	1.27368	0.25271
HNPCKTVVDCPPPHPYGFVVAVKCVRRLCIYNVHLHT	3.0663	8.89213	4214.01	0.0972973	0.894865	0.00808841
FNPLIRQYCVTDKDCPKFKKYNIRCRKGFCVQVNGG	5.71572	9.55938	4240.01	-0.594444	2.22333	0.649952
KNEPEPKFIECVTDADCLNSQSKMYALICEKNRCIYEFLKSMHYNLS	-1.18404	5.66455	5548.39	-0.517021	1.90702	0.455828
ALIECEIDLDCPKSYIKLWDRNYAHRCVNNICEWVKKPRIY	0.812443	7.85818	5012.86	-0.429268	1.97829	0.16597
DDVVFQYVFDGCRIDADCPISGLQLLKWMCINNECEFNHVRPRYV	-3.18413	4.59071	5323.1	-0.0644444	1.66044	0.168874
VYIKCKTDADCPKSESTIFAMKCNNYRCIYDYIHKRNSYAT	2.80383	8.77373	4858.57	-0.646341	2.29634	0.00667269
YPGCETDAECPKIYELYPLIYKCENKFCILSQVLPYIV	-2.27513	4.58521	4460.26	0.136842	0.346579	0.0248956
NFECKSTNDCPKSVLRVWRCINNYCRPVRMKKIHNTM	5.80657	9.69551	4486.31	-0.748649	2.84703	0.246757
LETIECETDGDCPRSMIKMWNKNYRHKCIDGKCEWIKKLP	0.815263	7.85856	4813.64	-0.925	2.432	0.0200782
ECINDIDCPQTGNLFYVFICKNRICELINKYPQNL	-1.27565	4.78277	4135.8	-0.114286	1.394	0.375469
KSICKVDDDCPQRFVMYPLMFMCIKNICRLVNE	0.722654	7.86499	3953.8	0.136364	1.42333	0.245456
SDDECKIDGDCPISWQKFHTYKCINQKCKWVLRFHEY	-0.102053	6.88916	4565.19	-0.905405	2.36378	0.00665532
DIYCETDADCPQITDWFYVVKCVDHKCELTKKLRRLYEYQTQKSAETPYI	-2.18549	5.11871	6051.87	-0.694	2.2194	0.147402
LKKCITFEDCPISKTRVYKCLHGECRYTIPYIPKVPKVK	5.8044	9.42465	4599.6	-0.323077	1.44974	0.00515517
RGPIVTFWCQTNDACEHRFPNHGYKCINHLCQPPKISHNDLQFIST	1.07123	7.91171	5368.09	-0.602174	1.91348	0.0205732
IDIFVCQTDADCPKSELSMYTWKCIDNECNLFKVMQQMV	-3.27339	4.23322	4591.35	-0.00512821	1.23436	0.23586
KKTDIPCDSRNDCPQQILPRYVLCVNGLCRIYFP	1.71983	8.503	3969.67	-0.311765	1.94088	0.160315
VDIPCIVDDDCPILFFPRYSMCIDGLCLLFFLY	-4.27591	3.65644	3860.63	1.14848	-0.317879	0.0504101
HIPCVHHDDCPKRPYPRFMKCVDNFCETWIIGWE	-1.01201	6.27173	4173.83	-0.547059	1.82882	0.207176
AMFELTKSTIRCVTDADCPNVVKPLKPKCVDGFCEYT	-0.275524	6.21352	4123.84	-0.0324324	1.30946	0.0109189
LCISDEDCPEALPLMFVKCVCGACEYYTQIQDEK	-5.2788	3.94878	3858.46	0.0764706	0.966471	0.0222281
KTFYFSLPCKIDKDCPRNPPLNIRCRKSFCVQI	4.71771	9.43707	3931.71	-0.390909	2.12212	0.175931
IRTQISCVSDDDCPKVPYPLYIKCEDNFCDIWASPY	-3.27609	4.1715	4198.76	-0.272222	1.58	0.0883546
TTPTPCRTDQDCPRKKKFSVTCRKGFCAEIRHVY	4.80769	9.43641	3973.62	-0.920588	3.11441	0.0183095
YRELICKTDDNCPRRGTNKYFIHKCIDYRCQWIPR	3.8078	9.13174	4406.1	-1.06	3.35114	0.523799
YRTRIPCVSDYDCPKASYPLFIKCIYNFCEIWGSPTWDATN	-0.279344	6.1334	4838.52	-0.265854	1.38341	0.00812176
SDAYVPCITVADCPPNTWFKIYRCEKGICRYHKLWIV	1.80671	8.47725	4390.18	-0.00540541	0.998919	0.0705706
AVHKECKTDVDCRQIWFVTKCINHECQPIL	-0.100299	6.8894	3558.17	-0.216667	1.69233	0.0144326
TTTFPCVSDDDCPVPLPPPFAKCVDGICEFFIKAQVEK	-3.2724	4.23322	4158.83	0.139474	0.770526	0.160387
YVWCETVEDCFKSQYFIFDCINNQCINVGKNPKEPRYPGIPRDQ	-1.27372	4.99626	5258.95	-0.697727	2.10409	0.218814
YLKCKTVHDCPKSQVVYRCVGNYCRAVKIRRWNLG	6.80176	9.76366	4157.95	-0.417143	2.12486	0.175241
QFCETDEDCRRRGSNQYWVYKCINHGCEYVQR	-0.185691	6.73405	3987.39	-1.29688	3.71062	0.423573
FIDCETVADCPTHWAYIYVCEKNKCRYHFKSGRVRPDHQKNRHNRV	4.07113	9.10237	5622.38	-1.04348	3.16674	0.0140459
RRVSYNSFFRALPVCQTAADCPEGTRGRTYKCINNKCRYPKLLKPIQ	7.71738	9.96111	5464.39	-0.682979	2.59809	0.0124433
NCTFIGFQDNPCKTDKDCRKVRGVNLRCRNGHCVMILQ	3.7981	9.07165	4384.13	-0.510526	2.64737	0.187061
ETRIPCVSRNDCPKRPYPLFMKCIDNFCEIWKIGKE	1.72615	8.48912	4331.13	-0.572222	2.19111	0.527302
YPPCETVADCPESYFRIYRCENNFCRYREAVRRLRPPLRKK	4.72679	9.38242	5096.9	-1.0561	3.62659	0.293031
QNIDAIIKCETVADCPPDTEHKKYRCVKNICIYRWFL	0.810641	7.8639	4428.18	-0.345946	1.86676	0.0994284
SSPIRVTDVSRPCTTDKDCSKVEYGYKLRCRKGRCVHIPR	5.80779	9.61802	4611.36	-0.8425	3.3255	0.0165184
SFGRIVYWNCKTDKDCKQHRGFNFRCRSGNCIPIRR	6.80586	10.0978	4363.04	-0.947222	3.47861	0.0044477
NIRINILFFSFDNTDKIGCKTSEDCPYLGKCIEDFCQFKK	-0.275402	6.23828	4695.42	-0.29	1.80925	0.112599
TPQKKVTDVSHPCTTDKDCPKVQHGYKLRCRKGQCVHI	4.97837	9.34216	4336.05	-1.01053	2.65053	0.0545018
ALERTETTMHNVQPSHFIPCFTAADCPMIDEPHYIECVTGFCWALMRNLH	-3.91834	5.26957	5778.64	-0.04	1.183	0.244357
AYERTEPIMHNGEPINLIPCVTVADCPRMDEPLHMTCLVGACWPCIRSLY	-3.1036	4.96905	5660.65	0.094	0.9772	0.148181
AFVKCETDDDCPKYNGFRKYECVNNWCRLTGLH	-0.18836	6.72868	3926.43	-0.781818	2.46212	0.169831
ATCITDADCPYDGKCIDGFCRFNVKNNNQV	-1.27803	4.57751	3325.71	-0.41	2.126	0.0758232
QRTCSNFLECYKIYGIPLDGVWRCVKGFCELLIDFNTYKVREVAIVRGENIN	0.727947	7.85329	6088.09	0.00961539	1.45442	0.132227
YIQCDFDADCPEMFRHIFYLCIDKLCRQFVTL	-2.18805	4.75046	3947.63	0.265625	1.27844	0.141818
EITNIPCVSDESCPQVIKPLVIKCIDKFCEYFMEGEYEGP	-5.26539	4.16796	4568.28	-0.06	0.99575	0.00437913
YKTKTPCKSLNDCPKAIKPIFVKCLGNICQYSIGRI	5.71362	9.509	4044.91	-0.116667	1.0475	0.0739526
EITNIPCVSKDDCPKVITPLVIKCIDHFCEYFWLNMRDHNHVIETMRSKSNN	-1.01008	6.28285	6149.12	-0.325	1.90288	0.390979
KTPFICVSDKECPTASYPLVCKCIDNFCHVLIAE	-1.19836	5.48268	3788.48	0.408824	0.540882	0.104223
TELNIPCVAVDDCPKVEKPLNMWCMHQYCVYGFIKPYK	-0.191459	6.72401	4477.33	-0.1	0.684474	0.0809876
TNIPCENKRDCPQPLYPKFVTCFEGLCRMHYPLKKI	2.8084	8.84628	4284.11	-0.530556	1.67417	0.438235
AIERTEPMLTTYLILCVSEADCPKVVKPNYTMCAGGICWQSVQGSNQGP	-1.27396	4.8705	5304.14	0.00816326	0.792041	0.534841
EITNIPCVSKDDCPKVVKPLVIKCIDHFCEYFWLNMMGHNHVIVTTRSKSNN	0.984999	7.8843	6019.06	-0.111538	1.34519	0.29591
WFKRTETGDNVQPSHFIPCFTAADCPMIDEPHYIECVTGFCWALMRNLH	-3.0082	5.31072	5729.56	-0.163265	1.26959	0.289055
AFAGWIKCKVDEDCPNVFTYSYYKCVNELCEIFLREIPKKPYM	-0.27502	6.29855	5156.05	-0.167442	1.09628	0.017048
WFKRTETGEIIWVVRCVTDTDCPKMGEPQYFKCLNGVCLEHIRELP	-1.18006	5.66469	5442.35	-0.273913	1.59935	0.0227937
EKTHVRCITADDCPKVERPLKMKCIGNYCHYFLNNF	1.89669	8.47869	4288.02	-0.522222	2.05056	0.510661
AFERTETRMLTIPCTSDANCPKVISPCHTKCFDGFCGWYIEGSYEGP	-2.19276	5.00749	5262.97	-0.297872	1.47085	0.0561396
PCVTVADCPPVKKPLKMWCIRQTCFYGFGKRPDL	3.71772	9.16642	3898.74	-0.102941	0.999118	0.109387
EHLKIRCVTDDDCPKVEKPLYMYCGNHWCAYKLHFV	-0.0159996	6.98545	4356.09	-0.411111	1.47722	0.305979
KTFLMAEYIKCDTDADCPIVIHHSFYKCIDNLCKRFRRQKHLV	2.98229	8.82703	5201.15	-0.274419	2.01465	0.558111
REPTKIPCVSDSDCHKVKKPLLLTCIDGICQYTLEATPFD	-1.18723	5.54643	4479.22	-0.215	1.49175	0.0952476
RSKFPCLSIIDCPDLRYHTLQNCIRGFCVYLE	0.809697	7.88214	3804.48	0.059375	1.57969	0.0674429
NTFLMADNIECDTDAGCPKMVHHIFYKCIDNKCKQFRRS	0.897125	7.88022	4594.31	-0.530769	2.31154	0.385218
SIKTKIACVTDNDCPRAIKPVVMWCINNYCHYYLYGYQ	1.80191	8.45231	4488.25	-0.0973684	0.981316	0.0424444
KLWCDTDADCQEKFPGPSKYPIKCMKGICKCVIN	1.70978	8.37389	3863.61	-0.388235	1.26735	0.539671
IKIFTEHRCRTDADCPARELPEYLKCQGGMCRLLIKKD	1.81443	8.49039	4452.27	-0.552632	2.46211	0.0091574
EKLDIRCATVDDCPKVTKPVVMMCTGKFCHYFFVRKQIL	2.80783	8.84627	4564.54	0.138462	1.21077	0.0361488
ELVCDTDDDCLKFFPDNPYPMECINSICLSLTD	-7.26915	3.50224	3770.24	-0.0636364	1.51091	0.256754
NIPGARCATDEDCPVGEKCIGGNCVE	-3.26984	4.17756	2650.95	-0.284615	1.68346	0.0235698
DCVSKIICVLSQKPLCRNHICVCYKLNR	3.79488	9.04436	3249.98	0.271429	1.3425	0.0093182
RKGGPPGGRTYIPCISDDDCIVAQPPYVLLCVNNFCTYFRDDDLPQR	-1.27681	4.77761	5290.01	-0.410638	1.96979	0.0275808
VFKRTETGEIIWTLPCATDTDCPKMGEPMYFKCLNGFCLEHIRELHD	-3.09176	5.08223	5490.36	-0.285106	1.52021	0.0751838
RSFPSSFVSPKSYTSEIPCKATRDCPYELYYETKCVDSLCTYW	-0.276841	6.24845	5052.69	-0.523256	1.88558	0.0445493
RLVFVNPEKPCVTDADCDRYRHESAIYSDMFCKDGYCFIDYHHDPYP	-4.01154	4.96382	5633.28	-0.685106	2.41191	0.172132
LVIIDHHKPCVSDTDCAFYLDIPPTVKYCSDGLCAWYFPDNPLP	-4.10342	4.37736	4983.72	0.0909091	0.618409	0.0214897
RTSVPCNSDSDCPETTLRKLWKCVDGFCDVTVKEITKSCFICPKDVISMIRD	-0.291984	6.26989	5884.84	-0.173077	2.03769	0.103265
LIKACDTDVDCQKKYPGPFEHLLKCIHGYCVCFPRNPGDSSGYPI	-0.114764	6.87711	5029.81	-0.302222	1.21267	0.270642
CGGKTHYSEIIECKNDADCPIGYKCIDEMCKYG	-2.19743	4.95262	3688.21	-0.536364	1.5903	0.0252277
SFSQIFNSACKTDKDCPKFGRVNVRCRKGNCVPI	4.71871	9.50012	3819.45	-0.452941	2.43882	0.00693601
DERECVTDADCQKKYPGPYEHLLKCVSGYCVGVTG	-2.18654	4.95268	3864.35	-0.531429	1.73229	0.149341
NKIAIYCVSDDDCLKTFTPLDLKCVDNVCEFNLRCKGKCGERDEKFVFLKALKKMDQKLVLEEQGNAREVKIPKKLLFDRIQVPTPATKDQVEEDDYDDDDEEEEEEEDDVDMWFHLPDVVCH	-16.0874	4.3929	14404.2	-0.739837	2.5613	0.0134893
SIIFLPCITDKDCPDDKKIKGRCRKGFCTNGWLG	2.71997	8.86727	3829.53	-0.373529	1.79294	0.0134143
TNTKTTIPCKFDNDCPEISYPLILMCIDDFCEYLLA	-4.27339	3.95926	4144.81	0.158333	0.895556	0.131919
FKTAITCDCNEDCLNFFTPLDNLKCIDNVCEVFM	-4.2813	3.95926	3920.53	0.285294	1.13853	0.588303
ALIECQIDDDCPPIKFAKYLCINYKCRKICLGE	-0.286424	6.20649	3820.57	0.0606061	1.09273	0.155264
ELEIRCVSDADCPLFPLPLHNRCIDDVCHLFTS	-4.09507	4.50786	3772.34	0.206061	1.46242	0.478468
RQTDIPCKSDDACPRVSSHHIECVKGFCTYWKLD	-0.101876	6.88774	3939.47	-0.644118	2.42647	0.0246818
KDGCKTNFDCLIKYPDHNEDILQCIGGHCLCLTN	-2.11176	5.30083	3825.38	-0.326471	1.52235	0.341408
FFVDTPCKIDEDCPQFQRPWSQIVKYYCIADQCFYYIKHIK	-0.193037	6.72161	5080.89	-0.32439	1.42195	0.475666
TKTAIACVTNKDCLKFFTPLDNVKCVGNVCEFFL	0.721554	7.86496	3783.49	0.473529	0.565	0.0135891
SFSEIIDSACKTDKDCPKLHKVNVRCRKGKCVAI	3.80783	9.13285	3793.49	-0.35	2.22706	0.00940447
GLIPCVSDADCPEELALVMKCINKLCELVMEIED	-6.26409	3.89168	3737.45	0.552941	0.455588	0.57406
GLIPCVSDADCPEELALVMKCINKLCELVME	-4.26802	4.07909	3380.08	0.687097	0.157419	0.328568
GGKECVTDVDCEKIYPGNKKPLICSTGYCYSLYEEPPRYHK	-0.188845	6.73681	4685.34	-0.834146	1.82073	0.369385
KECVTDADCDKLYPDIRKPLMCSIGECYSLYKGKFSLSIISKTSFSLMVYNVVTLVICLRLAYISLLLKFL	2.70869	8.65229	8078.76	0.592958	0.354085	0.576632
GGNECVTDVDCEKLYPGNKKPLICNIGYCLSLYKEPPRYM	-0.276831	6.24846	4525.27	-0.4575	1.31525	0.054335
GGNECVTDVDCEKLYPGNKKPLICNIGYCLSLYKGNFFFIYYI	-0.280631	6.18222	4916.72	0.0744186	0.47186	0.0716602
DRDPIYCKSDADCPKESYPLFVKCVDNFCDFIIV	-3.27497	4.27428	3959.53	-0.0911765	1.66912	0.254291
NIPCNSDSDCPWKIYYTYRCNDGFCVYKSIDPSTIPQYMTDLIFPR	-1.28091	4.68881	5445.17	-0.465217	1.77717	0.133432
SERECVTDDDCEKLYPTNEYRMMCDSGYCMNLLNEPPCNI	-6.27488	4.01346	4696.25	-0.805	2.62825	0.307078
QIMFSDCKTDKDCPQFRRANIRCRKGQCVKL	4.71982	9.49921	3689.37	-0.816129	3.29968	0.00938013
TINVMCYYDHDCPFVLDHIAECKGGVCEYTAFFYE	-5.09836	4.28515	4097.63	0.157143	0.714571	0.233948
EQCVYDADCEKIYPLHRQHLFKCIKAFCVRLGRQNQVEEVHVAKDGVFPSTVHAADATGVDAKGRKDLS	0.0791288	7.06167	7742.81	-0.410145	2.0271	0.0205377
SDIPNNSNRNSPKEDVFCNSNDDCPTILYYVSKCVYNFCEYW	-3.2754	4.23322	4958.41	-0.771429	2.40095	0.114869
QMINFSGCKRDKDCPQFRGVNIRCRSGFCTPIDS	2.72182	8.94341	3880.47	-0.582353	2.82471	0.255509
SFSHFFEGACKSDKDCPKLHRSNVRCRKGQCVQI	3.89587	9.20492	3912.5	-0.741176	2.82882	0.215919
DTSCHSFDDCPWVAHHYRECIEGLCAYRILY	-3.01201	5.24682	3704.14	-0.258065	1.76387	0.0266281
ELINCITDDDCPKSEFRKWVCINNICRKMCRTKV	1.71555	8.4042	4075.83	-0.423529	2.60176	0.544557
VKIPCVKDTDCPTLPCPLYSKCVDGFCKMLSI	0.708964	7.80517	3518.3	0.40625	0.345313	0.132334
DKRECDTNFDCQQKFSTQAEDLLWCIRGYCMSIPN	-2.27242	4.52895	4159.67	-0.76	2.66371	0.100058
ERECDTDADCQKKFPGSNQHLLWCNNGFCDCRTH	-2.10697	5.37586	3972.35	-1.16765	3.23765	0.119502
APLMLKPCITDKDCPKHRGVNGKCRKGYCVGVGRNY	5.80289	9.55943	3978.74	-0.608333	1.94111	0.35573
RIMVVNPNNPCVTDADCQRYRHKLATRMVCNIGFCLMDFTHDPYAPSLP	0.896292	7.89235	5625.55	-0.2	1.78898	0.0372769
IYFRKPPPCITDKDCPQMKINNVRCRKGFCIQIHKFTP	5.80389	9.6209	4537.46	-0.560526	2.05947	0.0405038
FPDKIFIGDCKTDKDCKPKRGVNFRCRKGKCYPR	6.71695	9.69645	4020.77	-1.15294	3.29412	0.0263323
SFSKTFDRACKTDKDCPKLRGVNVRCRKDQCVTV	4.71995	9.43636	3905.54	-0.770588	3.35559	0.0128246
RTPCVSDDDCLEAFLPPIWKCVHNFCEFNIRNIFN	-2.18436	4.82843	4157.77	-0.0657143	1.67143	0.0775942
SGITYFDVRCEKDKDCPKPPRINIRINIRCRKGFCVQI	4.72163	9.43563	4483.31	-0.526316	2.74053	0.0122183
NMVVLGCVSDDDCPKVPLPRFLKCIANLCCLVRKKDL	1.71106	8.4042	4120.05	0.424324	0.931892	0.106589
SPGRLSFGDCKIDKDCPKLRGGSFRCRKGKCVLE	4.72164	9.43635	3757.42	-0.688235	2.67941	0.0236859
ELIKCTMDADCPTSLNRKWLCINNICRKMSCTLRCW	2.70272	8.67461	4264.13	-0.111111	1.85556	0.655513
TFRTRLPCEKDDDCPEAFLPPVMKCVNRFCQYEILE	-2.26793	4.71612	4308	-0.430556	2.24278	0.143947
EKECDTDADCRKKFAGANQHLLWCNNGYCECHTH	-2.02009	5.78575	3941.33	-1.08529	2.76529	0.0350949
DKPRYTPRNAVKIAECVSYTDCQGGCPACYMRCIDGQCEPFIIKFI	0.703655	7.75641	5205.08	-0.176087	1.54239	0.189594
TTTTIPCTSIDDCPKMPLVVKCIDNFCNYFEIK	-1.27733	4.68436	3754.42	0.139394	1.00545	0.385274
DISGNLARASRKKPVDVIPCIYDHDCPRKLYFLERCVGRVCKYL	3.80792	9.1018	5112.04	-0.261364	2.10932	0.121614
AFSHFIPGCKTDKDCPKFYGSNVRCRKGKCVQLG	4.8039	9.38598	3791.44	-0.505882	1.87735	0.65467
KCYQDSDCPKDMCSFLFKPKCIFTRYFPIYLGGICGCDRKTCP	2.68727	8.54327	4992.93	-0.204651	1.38884	0.066092
GIYISFLFFDNIADRIPCVTNGDCPVMRLPLYMRCITYSCELFFDGPNLCAVERI	-2.28234	4.52891	6327.45	0.518182	0.759636	0.0784281
KDGCKTKFDCLIKYPDHNEDILQCIGGHCLCLTN	-1.11276	6.01151	3839.45	-0.338235	1.49029	0.615592
